# Supplementary material for: Regulating interfacial reaction through electrolyte chemistry enables gradient interphase for low-temperature zinc metal batteries
Source: PubMed Central journal article supplement (PMC10482877; doi:10.1038/s41467-023-41276-9), 2023-09-06
Supplement: 41467_2023_41276_MOESM1_ESM.pdf [file 41467_2023_41276_MOESM1_ESM.pdf]

## Supporting Information

### **Regulating Interfacial Reaction through Electrolyte Chemistry Enables Gradient Interphase for Low-Temperature Zinc Metal Batteries**

*Wei Wang<sup>1</sup>, Shan Chen<sup>1</sup>, Xuelong Liao<sup>1</sup>, Rong Huang<sup>1</sup>, Fengmei Wang<sup>2</sup>, Jialei Chen<sup>1</sup>, Yaxin Wang<sup>1</sup>, Fei Wang<sup>2\*</sup>, Huan Wang<sup>1\*</sup>*

<sup>1</sup>Key Laboratory of Advanced Energy Materials Chemistry (Ministry of Education), Renewable Energy Conversion and Storage Center (RECAST), College of Chemistry, Nankai University, Tianjin 300071, China

<sup>2</sup>Department of Materials Science, Fudan University, Shanghai 200433, China

\*E-mail: huan.wang0520@nankai.edu.cn; feiw@fudan.edu.cn

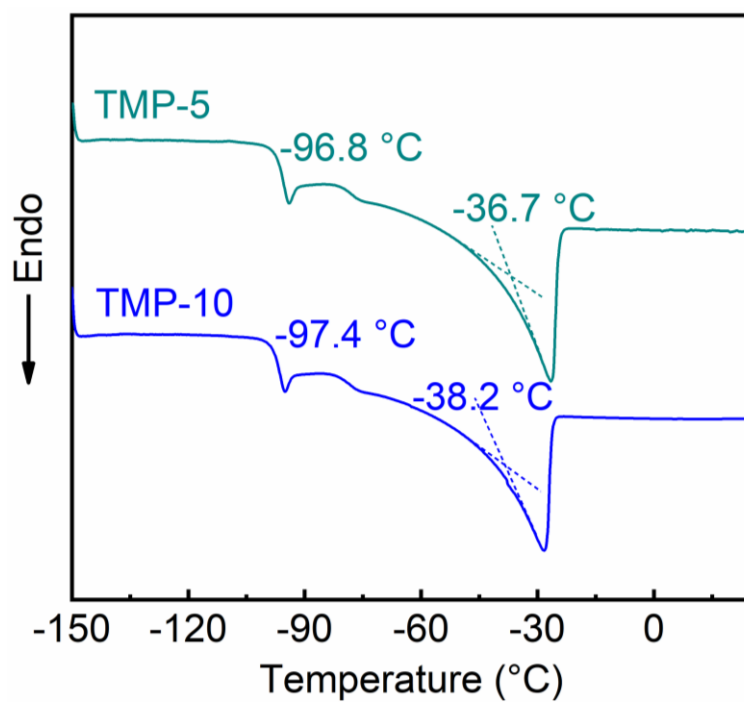

Supplementary Figure 1. Differential scanning calorimetry (DSC) curves of TMP-5 and TMP-10 electrolytes.

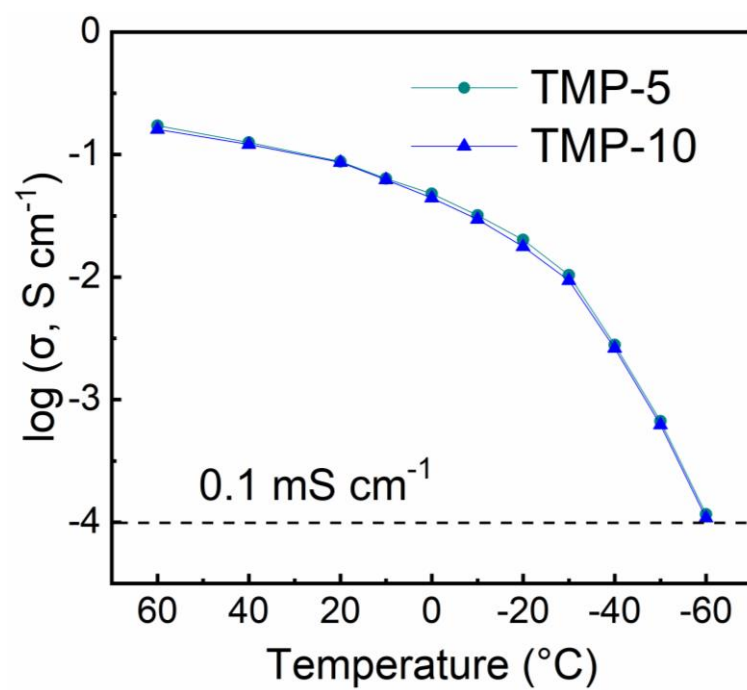

Supplementary Figure 2. Ionic conductivity of TMP-5 and TMP-10 electrolytes at different temperatures.

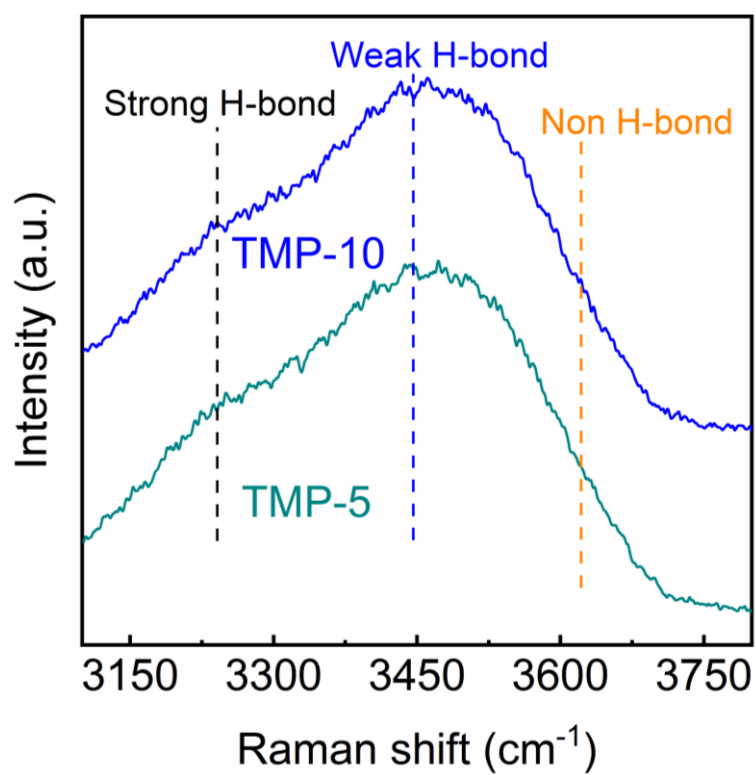

Supplementary Figure 3. Raman spectra of O–H stretching vibration in TMP–5 and TMP–10 electrolytes.

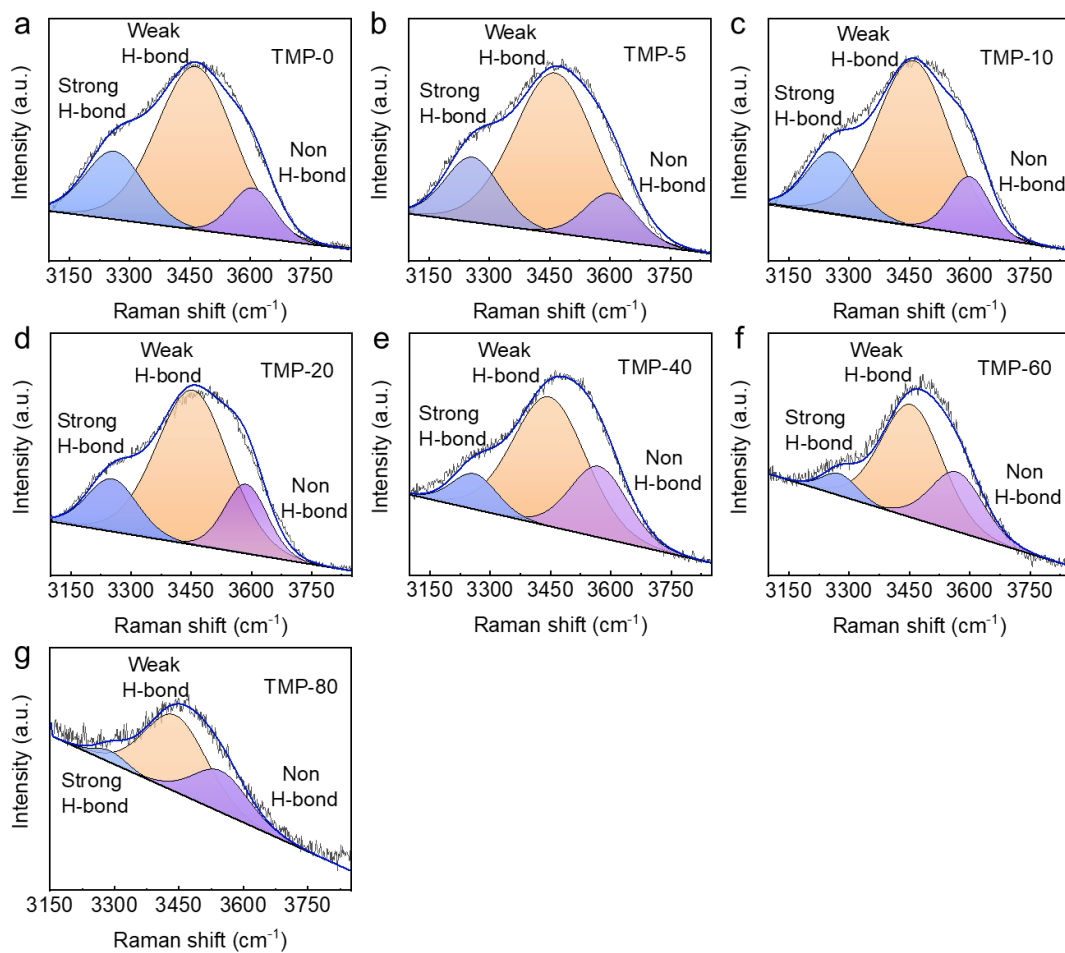

Supplementary Figure 4. The fitted H-bonds in various hybrids of electrolytes. (a) TMP-0, (b) TMP-5, (c) TMP-10, (d) TMP-20, (e) TMP-40, (f) TMP-60 and (g) TMP-80.

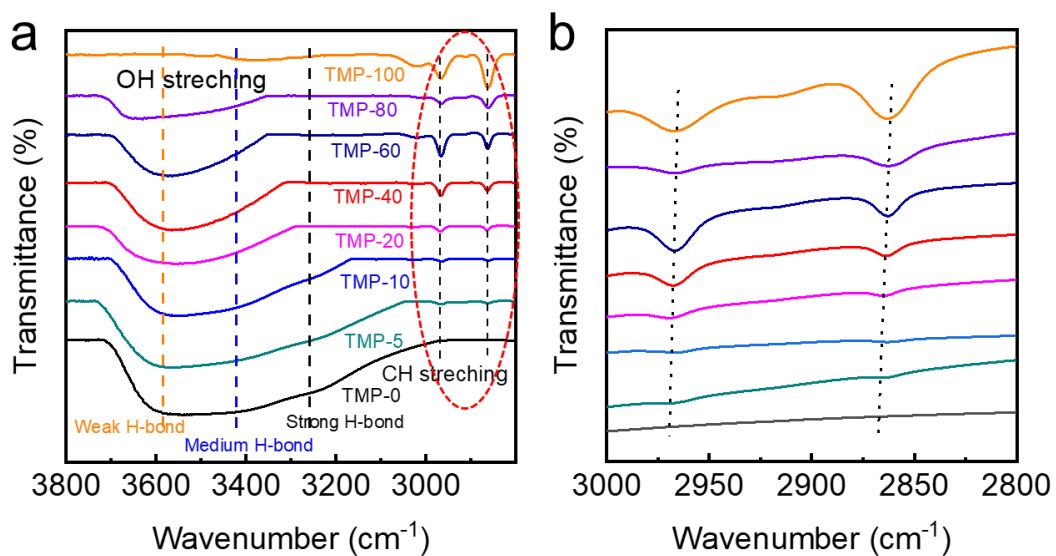

Supplementary Figure 5. FTIR analysis of different hybrid electrolytes. (a) Overall spectra and (b) the enlarged view of the selected region indicated by a red oval box.

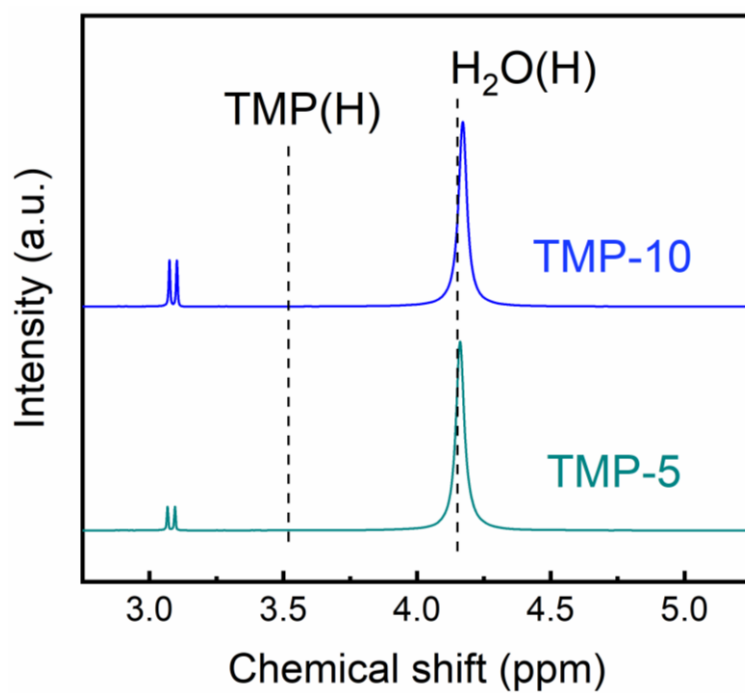

Supplementary Figure 6.  $^1\text{H}$  NMR spectra of TMP-5 and TMP-10 electrolytes.

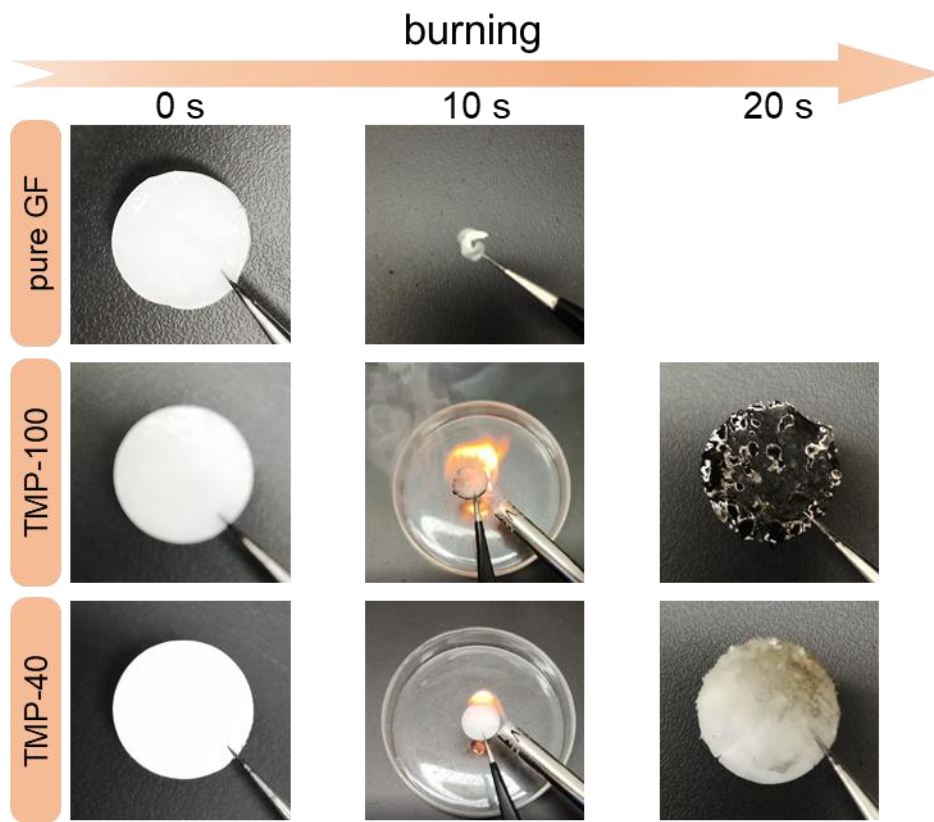

Supplementary Figure 7. Photographs of the combustion tests of pure glass fiber (pure GF) (top), glass fiber rinsed with TMP-100 (middle) and TMP-40 (bottom) electrolytes.



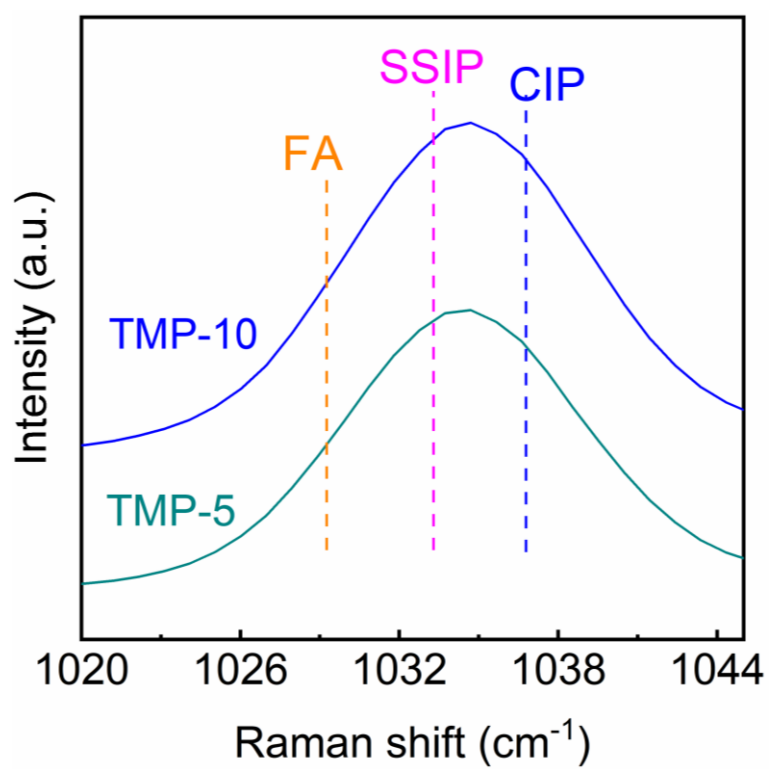

Supplementary Figure 8. Raman spectra to reveal the  $\text{SO}_3$  stretching mode in TMP-5 and TMP-10 electrolytes.

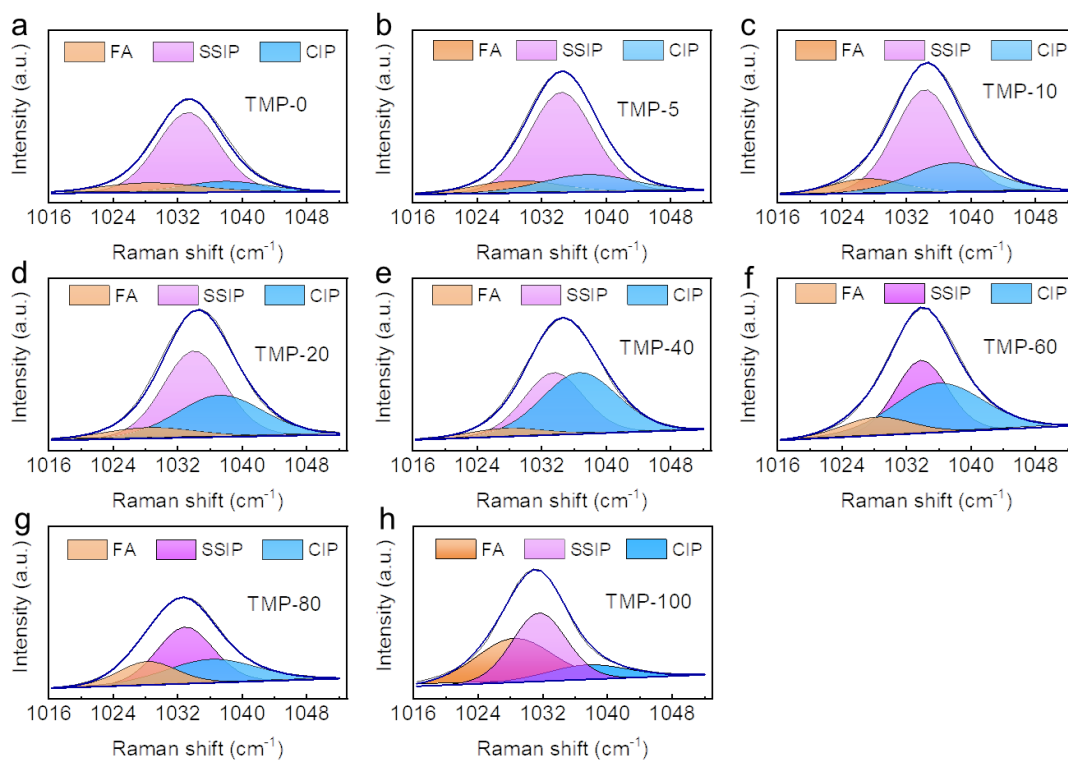

Supplementary Figure 9. The fitted  $\text{SO}_3$  stretching vibration in various kinds of hybrid electrolytes. FA, SSIP and CIP stand for free anion ( $\text{OTf}^-$ ), solvent-separated ion pairs ( $\text{Zn}^{2+}-(\text{H}_2\text{O})_x(\text{TMP})_y-\text{OTf}^-$ ) and contact ion pairs ( $\text{Zn}^{2+}-\text{OTf}^-$ ), respectively. (a) TMP-0, (b) TMP-5, (c) TMP-10, (d) TMP-20, (e) TMP-40, (f) TMP-60, (g) TMP-80 and (h) TMP-100.

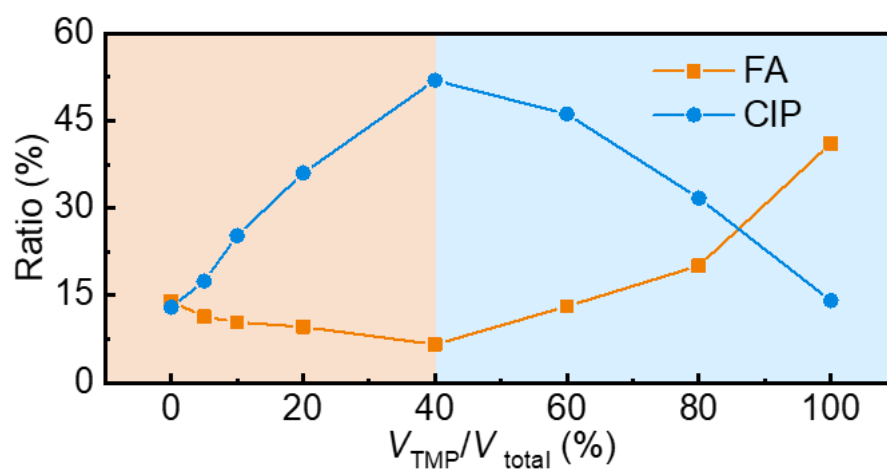

Supplementary Figure 10. The FA and CIP ratios with TMP content.

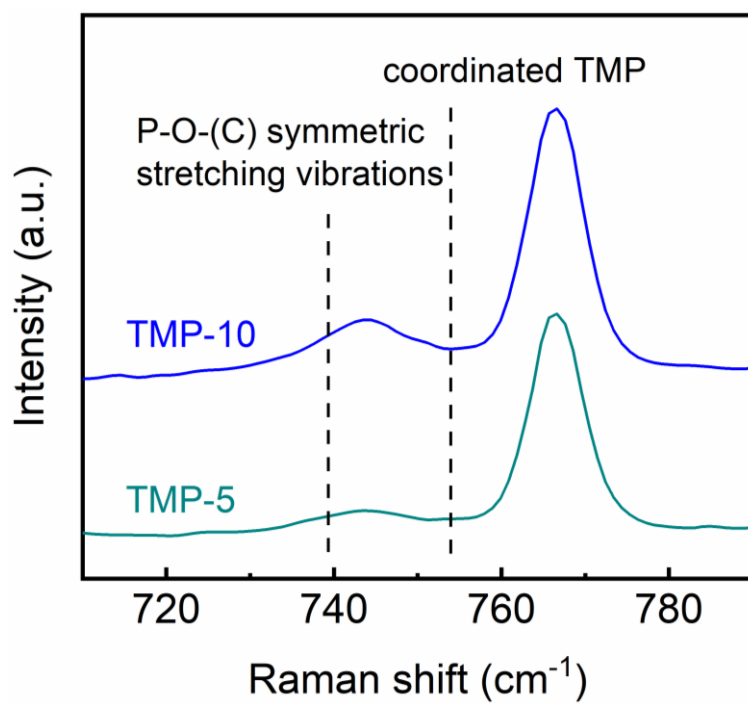

Supplementary Figure 11. Raman spectra to reveal the P–O–(C) symmetric stretching vibration mode in TMP–5 and TMP–10 electrolytes.

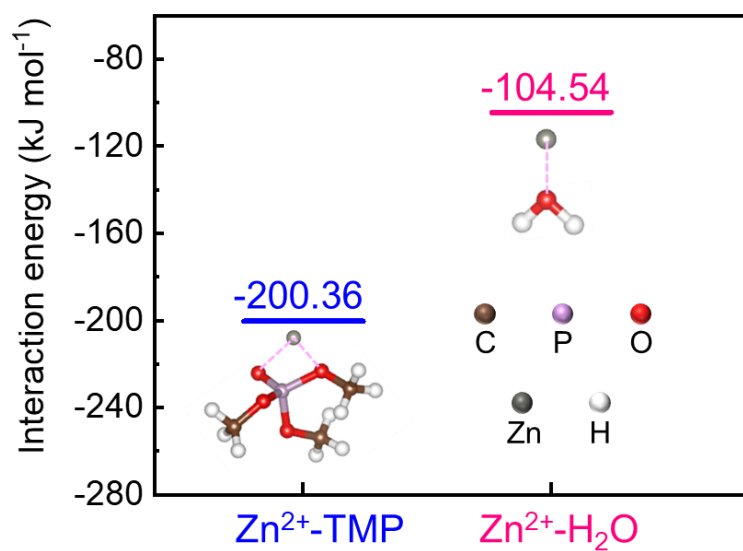

Supplementary Figure 12. The binding energy of Zn<sup>2+</sup>-TMP and Zn<sup>2+</sup>-H<sub>2</sub>O obtained from DFT calculations.

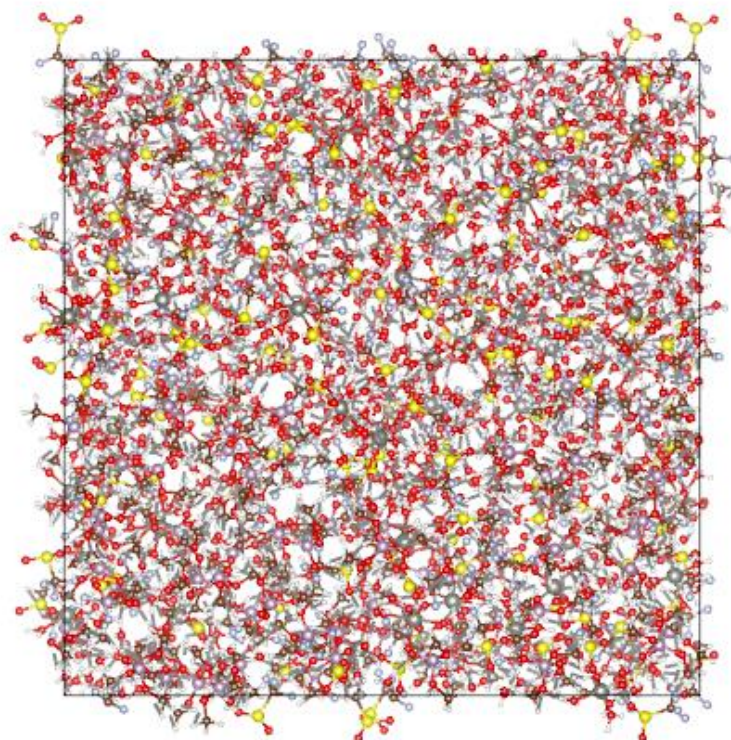

Supplementary Figure 13. Snapshot of the MD simulation cell for the TMP-40 electrolyte.

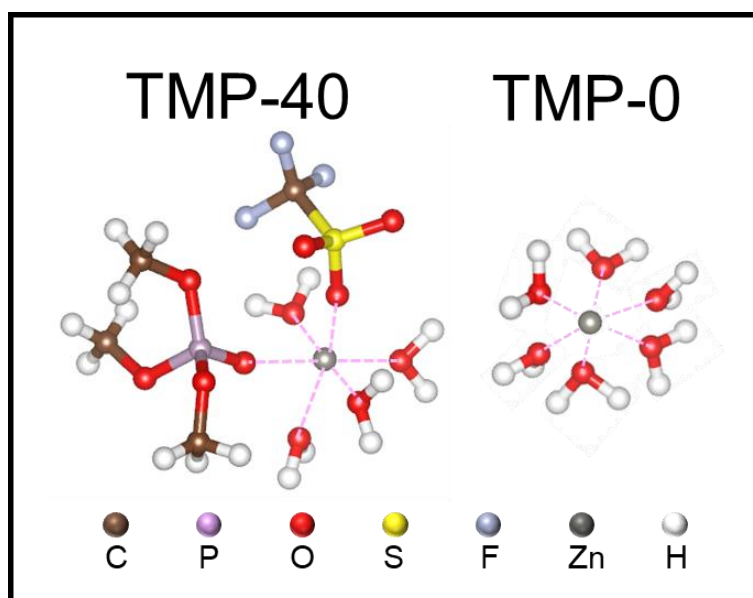

Supplementary Figure 14. Solvation structure model of TMP-0 and TMP-40 electrolytes.

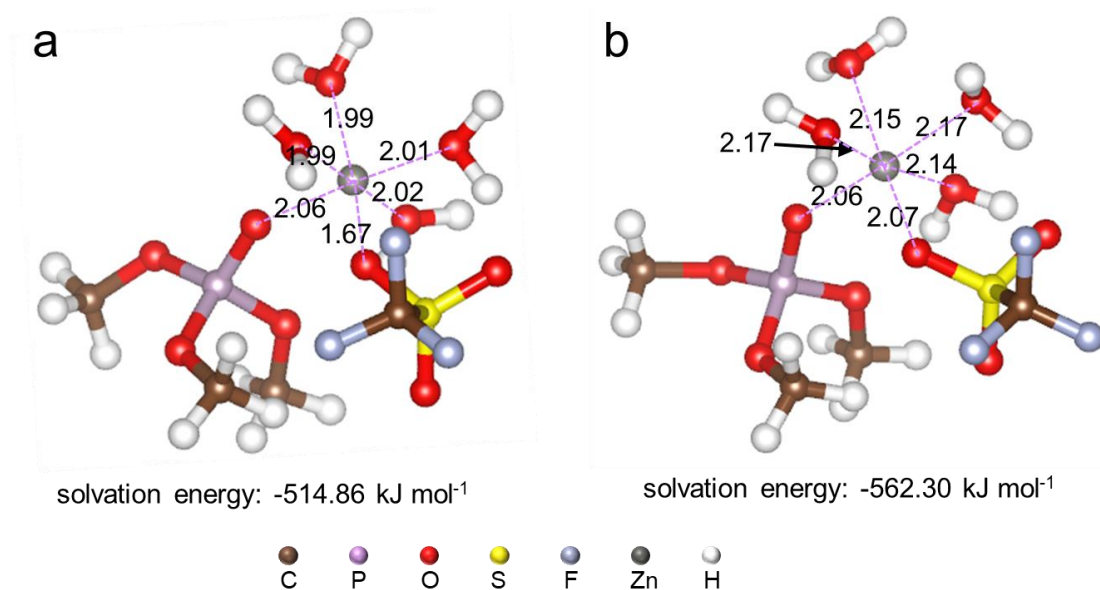

Supplementary Figure 15. Optimized geometric configurations (distance in Å) and solvation energies of the representative  $\text{Zn}(\text{OTf})(\text{TMP})(\text{H}_2\text{O})_4$  cluster with different calculation methods. (a) PCFF-INTERFACE force field and (b) B3LYP/6-31++G (d, p).

The solvation energies predicted by the two simulation methods are only deviated by 8.4% ( $-514.86 \text{ kJ mol}^{-1}$  vs.  $-562.30 \text{ kJ mol}^{-1}$ ). In the prediction of solvation sheath geometries, except for a certain deviation ( $0.4 \text{ \AA}$ ) in the distance between  $\text{Zn}^{2+}$  and  $\text{OTf}^-$ , other structural parameters are consistent. Therefore, considering the approximation of the force field, the molecular dynamics research results using PCFF-INTERFACE force field in our system research are acceptable.



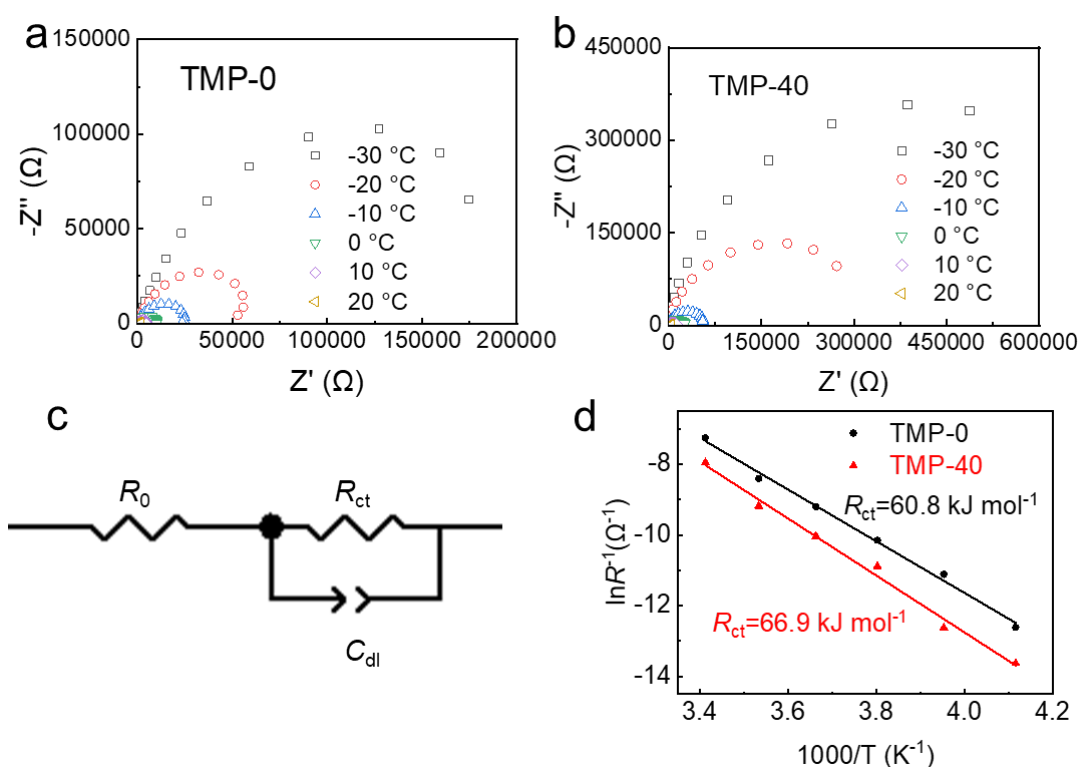

The fitting results corresponding to  $R_{ct}$  are as follows:

| Temperature (K) |                       | 243    | 253    | 263   | 273   | 283  | 293  |
|-----------------|-----------------------|--------|--------|-------|-------|------|------|
| TMP-0           | $R_{ct}$ ( $\Omega$ ) | 299900 | 66934  | 25552 | 9941  | 4477 | 1408 |
| TMP-40          | $R_{ct}$ ( $\Omega$ ) | 827930 | 302790 | 53342 | 22825 | 9720 | 2837 |

Supplementary Figure 16. Comparison of desolvation energy of TMP-0 and TMP-40 electrolytes before cycling. Temperature-dependent electrochemical impedance spectra of Zn||Zn symmetric cells with (a) TMP-0 or (b) TMP-40 electrolyte. (c) The equivalent circuit model.  $R_0$  is bulk resistance of the cell, which reflects electric conductivity of the electrolyte, separator and electrodes;  $R_{ct}$  and  $C_{dl}$  are faradic charge-transfer resistance and its relative double-layer capacitance, respectively. (d) Arrhenius fitting of  $R_{ct}$  derived from the Nyquist plots of the Zn||Zn symmetric cells with TMP-0 and TMP-40 electrolytes.

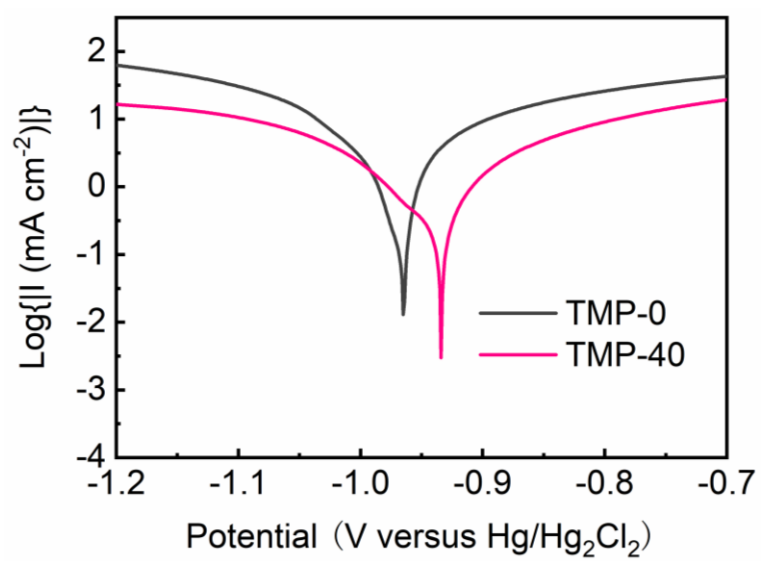

Supplementary Figure 17. Polarization curves of TMP-0 and TMP-40 electrolytes.

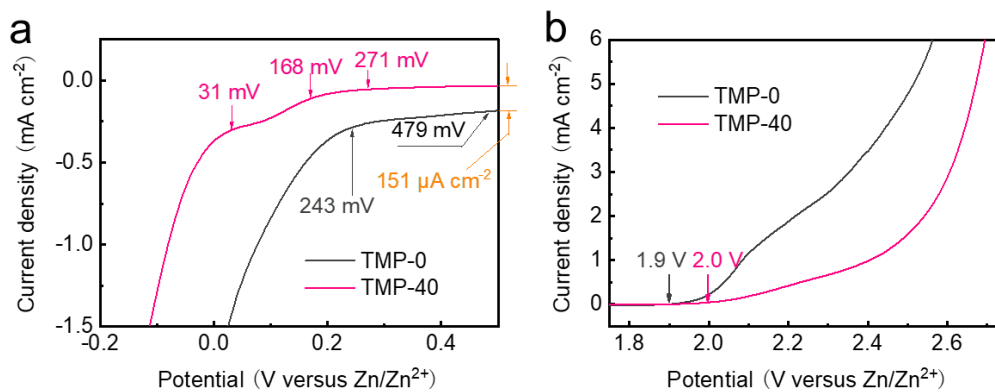

Supplementary Figure 18. Comparison of electrochemical stability windows of TMP-0 and TMP-40 electrolytes. LSV curves of TMP-0 and TMP-40 electrolytes to reveal the electrochemical stability in the voltage of (a)  $-0.2\sim 0.5$  V and (b)  $1.75\sim 2.75$  V.

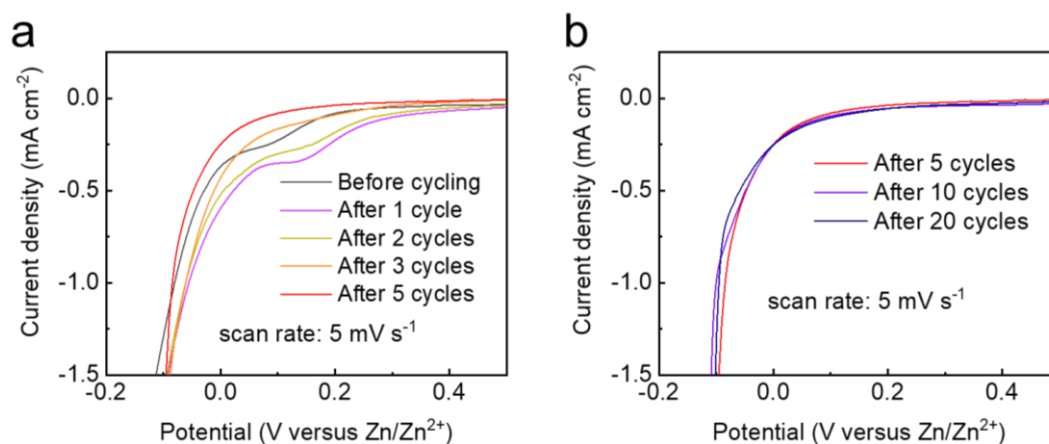

Supplementary Figure 19. LSV curves of Ti||Zn asymmetric cells after different cycles with TMP-40 electrolyte at a scan rate of  $5 \text{ mV s}^{-1}$ . (a) Within 5 cycles. (b) After 5, 10 and 20 cycles.

As shown in Supplementary Fig. 19a, the peak current density after one cycle of activation reaches the maximum value of  $0.334 \text{ mA cm}^{-2}$  and gradual decreases as the cycling proceeds. At the 5 cycles, the peak current density almost disappears and remains almost unchanged even after 20 cycles (Supplementary Fig. 19b), representing the SEI formation reaches the steady state. Also, an obviously negative shift is observed for the onset potential of hydrogen evolution reaction (HER) after 5 cycles compared to that before cycling, indicating the as-formed SEI can effectively suppress HER. These results indicate the as-formed SEI remains stable after 5 cycles.

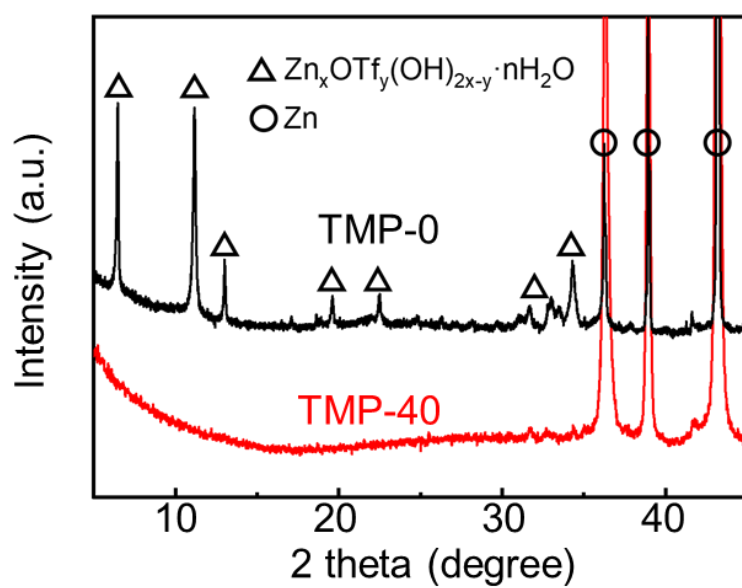

Supplementary Figure 20. XRD patterns of Zn anodes in TMP-0 and TMP-40 electrolytes after 40 cycles, where the characteristic peaks of  $Zn_xOTf_y(OH)_{2x-y} \cdot nH_2O$  (ZOTH) are observed.

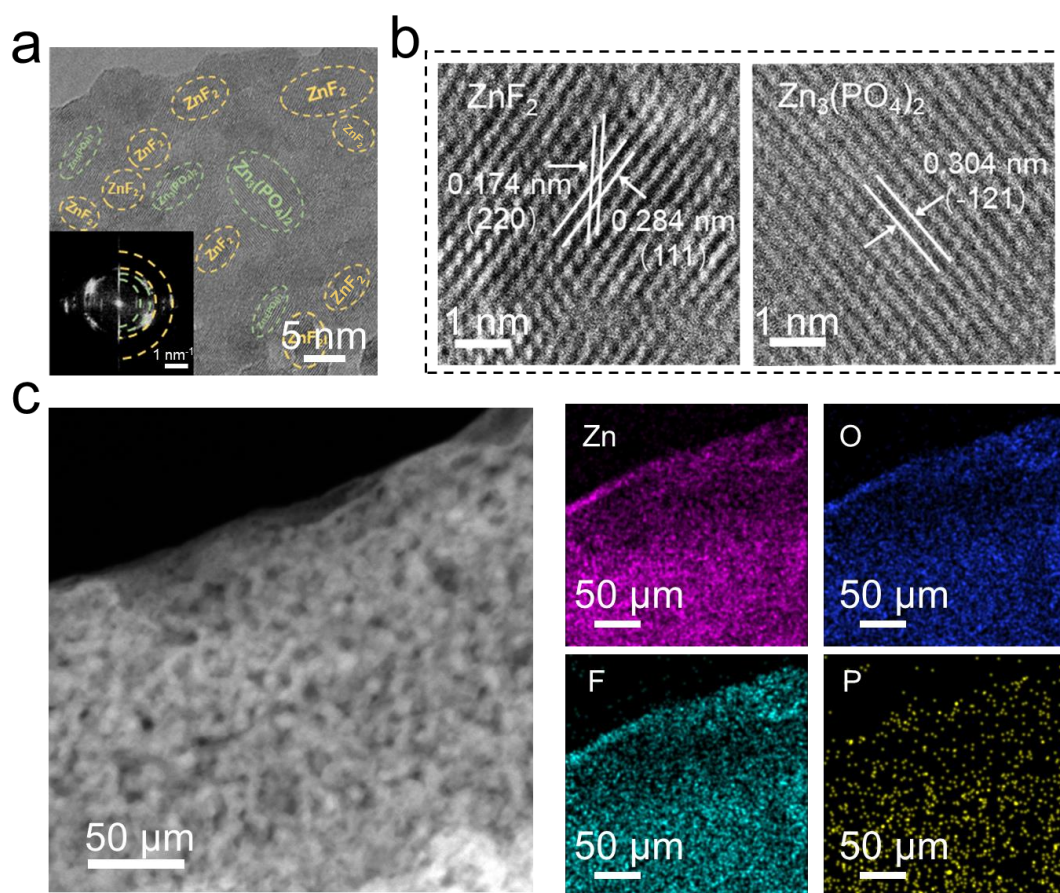

Supplementary Figure 21. TEM characterizations of Zn surface after cycling with TMP-40 electrolyte. (a) HRTEM image of Zn surface after cycling with TMP-40 electrolyte. Inset: the corresponding SAED pattern. (b) HRTEM images to reveal the lattice spacings of corresponding ZnF<sub>2</sub> and Zn<sub>3</sub>(PO<sub>4</sub>)<sub>2</sub>. (c) Element distributions of SEI formed on the Zn surface in TMP-40 electrolyte.

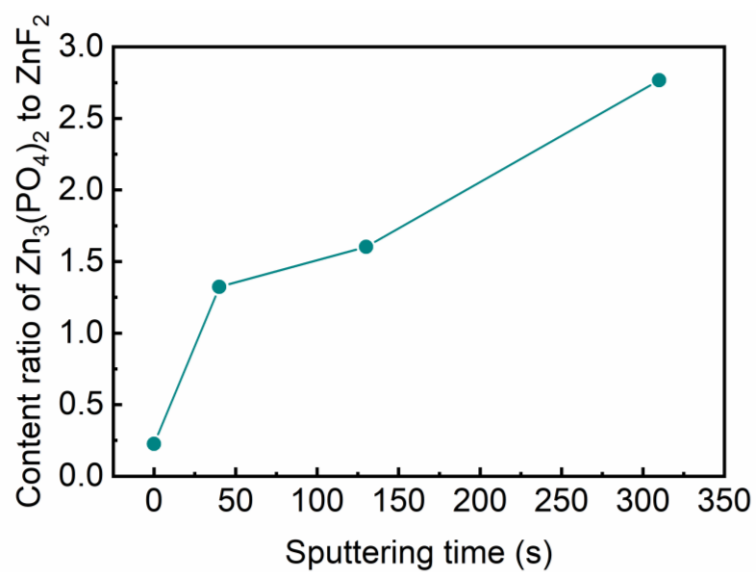

Supplementary Figure 22. The content ratio of  $\text{Zn}_3(\text{PO}_4)_2$  to  $\text{ZnF}_2$  with the increase of sputtering time.

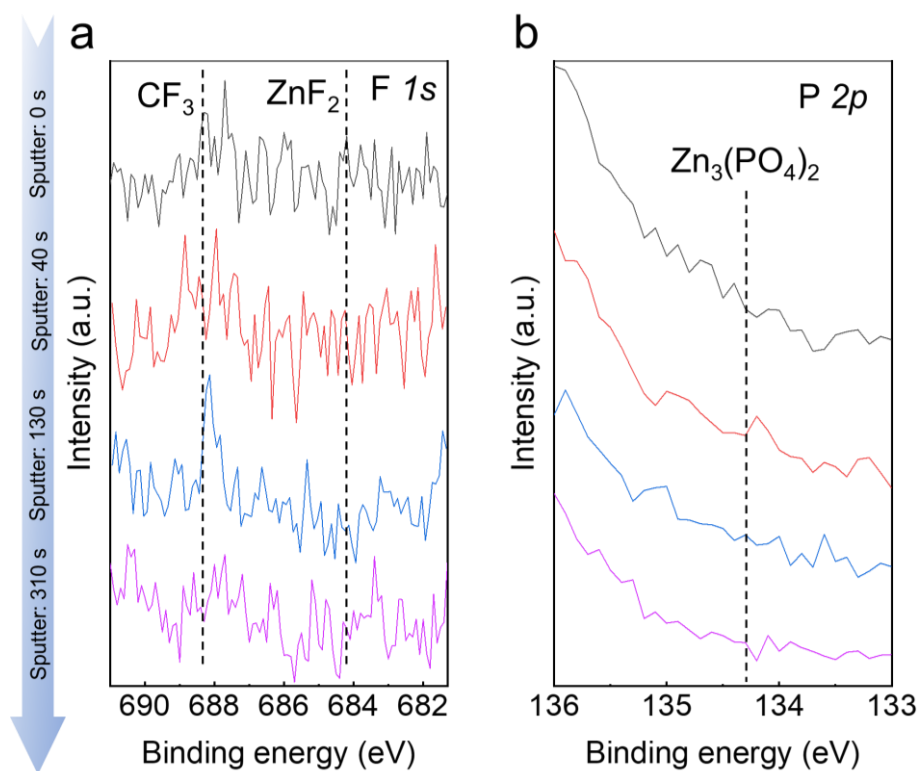

Supplementary Figure 23. XPS spectra on the Zn surface after cycling with TMP-0 electrolyte. (a) F 1s and (b) P 2p.



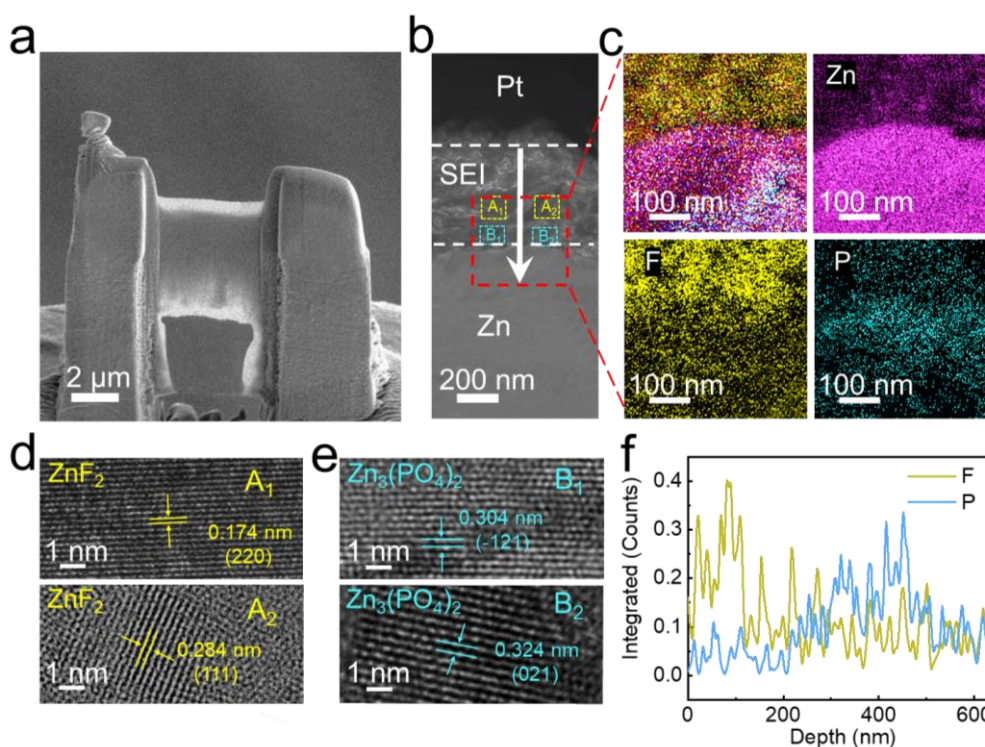

Supplementary Figure 24. Composition analysis of SEI layer formed in TMP-40 electrolyte. (a) SEM image of Zn electrode cycled in the TMP-40 electrolyte after focused ion beam (FIB) cutting. (b) TEM image and (c) EDS mappings of the selected region indicated by a red rectangular box. The Pt deposited on the electrode surface is used to protect the SEI from ion beam damage during sample preparation. (d, e) HRTEM images of the selected regions ( $A_1$ ,  $A_2$  and  $B_1$ ,  $B_2$ ) derived from Supplementary Fig. 24b. (f) EDS line scans of P and F element along the direction of white arrow in Supplementary Fig. 24b.

As displayed in Supplementary Fig. 24a, FIB cutting technique was employed on the Zn electrode cycled in the TMP-40 electrolyte after 20 cycles at a current density of  $1 \text{ mA cm}^{-2}$  for cross-sectional analysis. Accordingly, the EDS mappings (Supplementary Fig. 24c) in the selected region of Supplementary Fig. 24b reveal that the SEI layer mainly consists of Zn, F, and P elements. Notably, the content of F element predominately distributes the upper region of the as-formed SEI, while the P element mainly concentrates on the top surface of Zn electrode. The HRTEM images of the selected regions of  $A_1$ ,  $A_2$  and  $B_1$ ,  $B_2$  derived from Supplementary Fig. 24b confirms the lattice fringes of  $\text{ZnF}_2$  and  $\text{Zn}_3(\text{PO}_4)_2$  (Supplementary Fig. 24d, e), further confirming that  $\text{ZnF}_2$  and  $\text{Zn}_3(\text{PO}_4)_2$  dominates the top and bottom of the SEI, respectively. Moreover, EDS lines scan along the direction of the arrow in Supplementary Fig. 24b show the F content gradually decreases, while the P content

gradually increases as the depth of SEI increases (Supplementary Fig. 24f), according well with the EDS mappings.

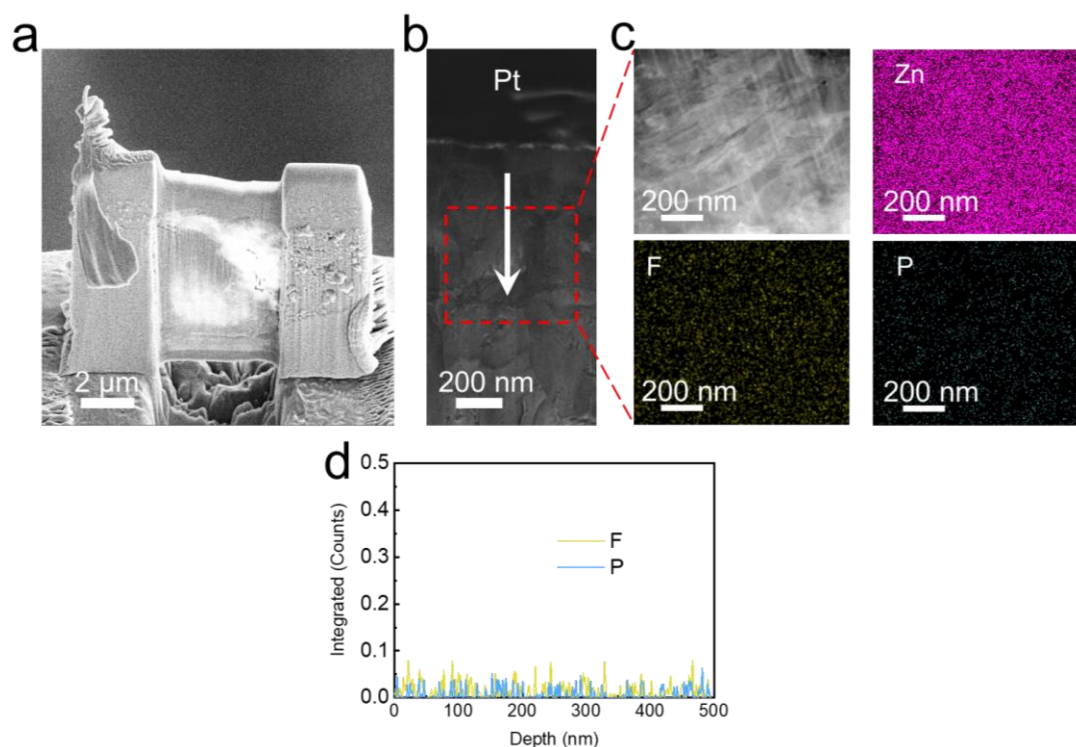

Supplementary Figure 25. Composition analysis of passivation film formed in TMP-0 electrolyte. (a) SEM image of Zn electrode cycled in the TMP-0 electrolyte after FIB cutting for TEM analysis. (b) TEM image and (c) EDS mappings of the selected region indicated by a red rectangular box. The Pt deposited on the electrode surface is used to protect the SEI from ion beam damage during sample preparation. (d) EDS line scans along the direction of white arrow in Supplementary Fig. 25b.

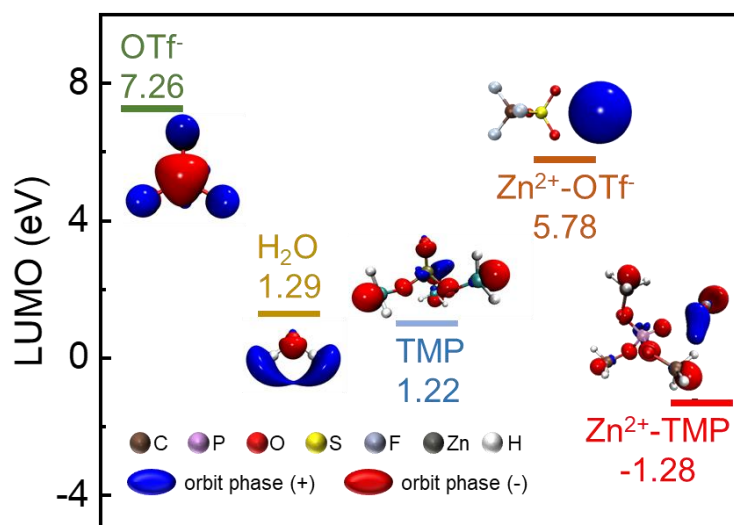

Supplementary Figure 26. LUMO energy levels with corresponding isosurfaces of free OTf<sup>-</sup>, free TMP, free H<sub>2</sub>O, Zn<sup>2+</sup>-OTf<sup>-</sup> and Zn<sup>2+</sup>-TMP coordination.

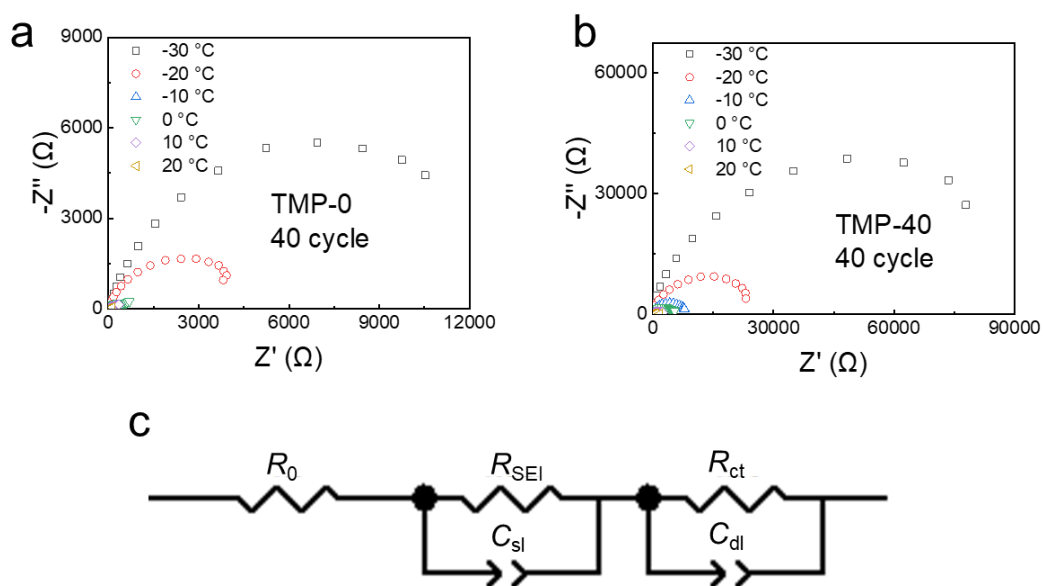

The fitting results corresponding to  $R_{ct}$  and  $R_{SEI}$  are as follows:

| Temperature (K) |                        | 243   | 253   | 263   | 273  | 283  | 293 |
|-----------------|------------------------|-------|-------|-------|------|------|-----|
| TMP-0           | $R_{ct}$ ( $\Omega$ )  | 13948 | 4491  | 1639  | 385  | 125  | 39  |
|                 | $R_{SEI}$ ( $\Omega$ ) | 6115  | 2820  | 995   | 279  | 100  | 28  |
| TMP-40          | $R_{ct}$ ( $\Omega$ )  | 55837 | 22355 | 10203 | 5010 | 1621 | 441 |
|                 | $R_{SEI}$ ( $\Omega$ ) | 31926 | 11203 | 5456  | 2356 | 1047 | 298 |

Supplementary Figure 27. Comparison of kinetic performance of SEI after cycling with different electrolytes. Temperature-dependent electrochemical impedance spectra of Zn||Zn symmetric cells after 40 cycles with (a) TMP-0 and (b) TMP-40 electrolyte. (c) The equivalent circuit model.  $R_0$  is bulk resistance of the cell, which reflects electric conductivity of the electrolyte, separator and electrodes;  $R_{SEI}$  and  $C_{sl}$  are resistance and capacitance of the surface layer, i.e. the SEI film formed on the surface of the electrodes;  $R_{ct}$  and  $C_{dl}$  are the Faradic charge-transfer resistance and its relative double-layer capacitance, respectively.

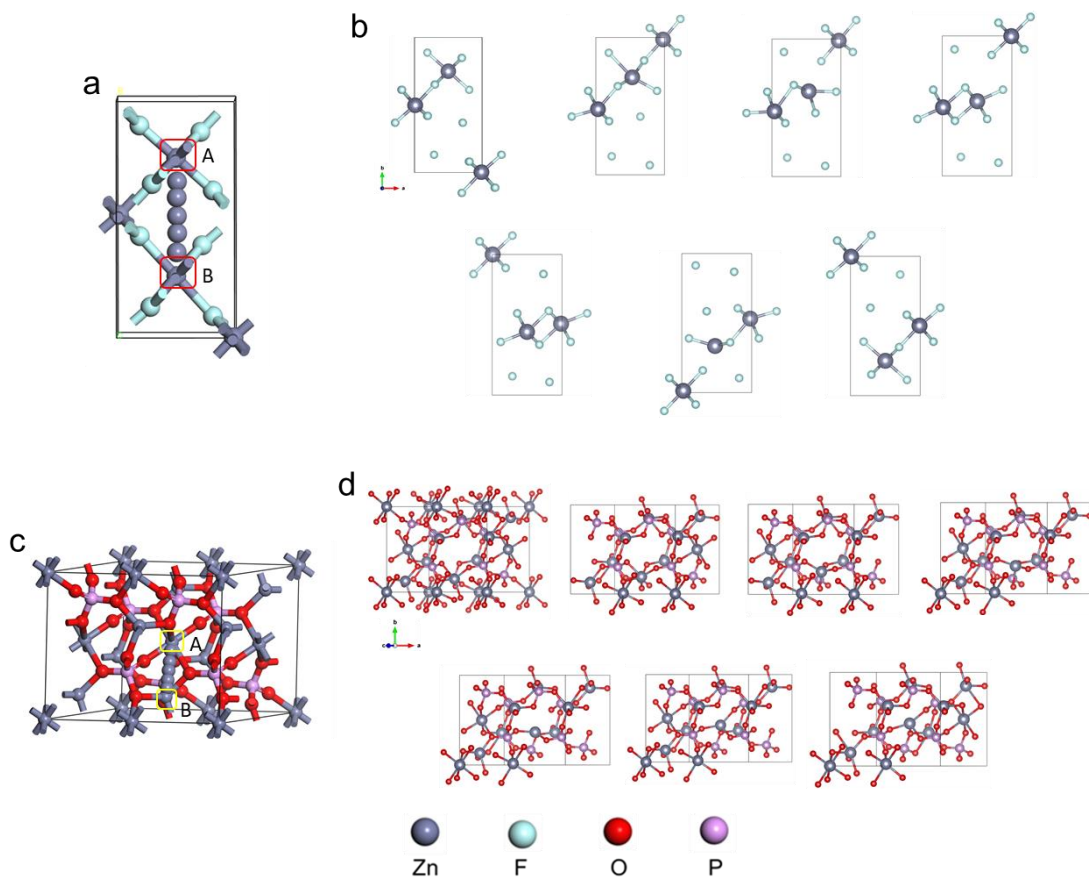

Supplementary Figure 28. Comparison of migration pathways of  $Zn^{2+}$  in different SEI components. (a) Simulation of  $Zn^{2+}$  migration path in  $ZnF_2$  and (b) corresponding migration models from A to B. (c) Simulation of  $Zn^{2+}$  migration path in  $Zn_3(PO_4)_2$  and (d) corresponding migration models from A to B.

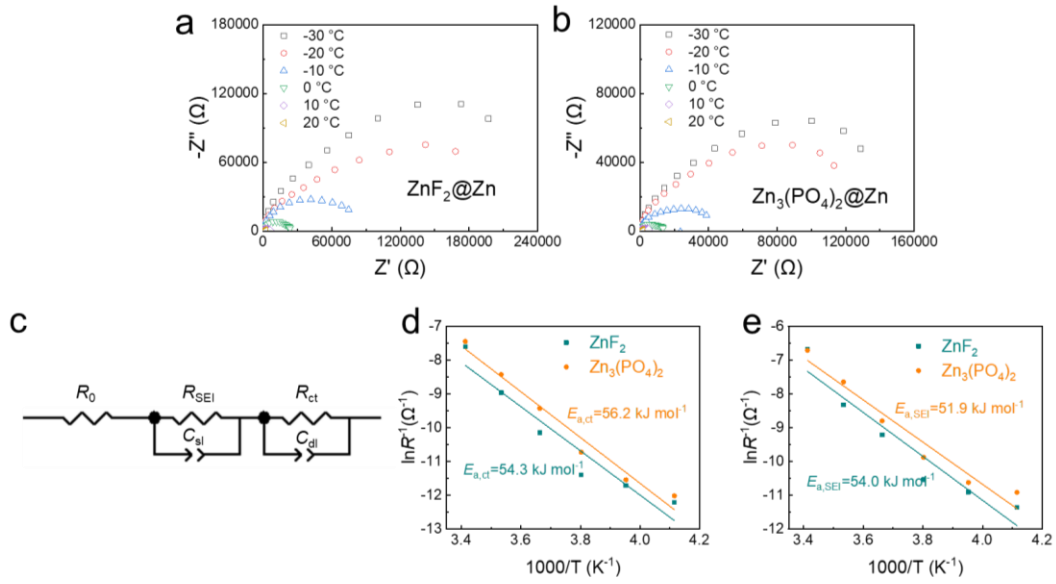

The fitting results corresponding to  $R_{ct}$  and  $R_{SEI}$  are as follows:

| Temperature (K)                                 |               | 243    | 253    | 263   | 273   | 283  | 293  |
|-------------------------------------------------|---------------|--------|--------|-------|-------|------|------|
| ZnF <sub>2</sub>                                | $R_{ct}$ (Ω)  | 201820 | 122030 | 89210 | 25574 | 7799 | 2006 |
|                                                 | $R_{SEI}$ (Ω) | 85699  | 54305  | 37539 | 9998  | 4148 | 807  |
| Zn <sub>3</sub> (PO <sub>4</sub> ) <sub>2</sub> | $R_{ct}$ (Ω)  | 165690 | 103290 | 45630 | 12466 | 4579 | 1722 |
|                                                 | $R_{SEI}$ (Ω) | 54755  | 41025  | 19520 | 6634  | 2100 | 826  |

Supplementary Figure 29. Kinetic performance of single ZnF<sub>2</sub> coating Zn metal (ZnF<sub>2</sub>@Zn) and single Zn<sub>3</sub>(PO<sub>4</sub>)<sub>2</sub> coating Zn metal (Zn<sub>3</sub>(PO<sub>4</sub>)<sub>2</sub>@Zn). Temperature-dependent electrochemical impedance spectra of (a) ZnF<sub>2</sub>@Zn||ZnF<sub>2</sub>@Zn and (b) Zn<sub>3</sub>(PO<sub>4</sub>)<sub>2</sub>@Zn||Zn<sub>3</sub>(PO<sub>4</sub>)<sub>2</sub>@Zn. (c) The equivalent circuit model.  $R_0$  is bulk resistance of the cell, which reflects electric conductivity of the electrolyte, separator and electrodes;  $R_{SEI}$  and  $C_{sl}$  are resistance and capacitance of the surface layer, i.e. the SEI film formed on the surface of the electrodes;  $R_{ct}$  and  $C_{dl}$  are the Faradic charge-transfer resistance and its relative double-layer capacitance, respectively. Arrhenius fitting of (d)  $R_{ct}$  and (e)  $R_{SEI}$  derived from the Nyquist plots of the ZnF<sub>2</sub>@Zn||ZnF<sub>2</sub>@Zn cells and Zn<sub>3</sub>(PO<sub>4</sub>)<sub>2</sub>@Zn||Zn<sub>3</sub>(PO<sub>4</sub>)<sub>2</sub>@Zn cells.

As shown in Supplementary Fig. 29d, e, the Zn<sub>3</sub>(PO<sub>4</sub>)<sub>2</sub> SEI exhibits higher Zn<sup>2+</sup>-desolvation energy ( $E_{a,ct}$ =56.2 kJ mol<sup>-1</sup>) and lower migration energy barrier of Zn<sup>2+</sup> ( $E_{a,ct}$ =51.9 kJ mol<sup>-1</sup>) compared with ZnF<sub>2</sub> SEI ( $E_{a,ct}$ =54.3 kJ mol<sup>-1</sup> and  $E_{a,SEI}$ =54.0 kJ mol<sup>-1</sup>). This further confirms the superiority of gradient ZnF<sub>2</sub>-Zn<sub>3</sub>(PO<sub>4</sub>)<sub>2</sub> SEI formed by TMP-40 electrolyte.

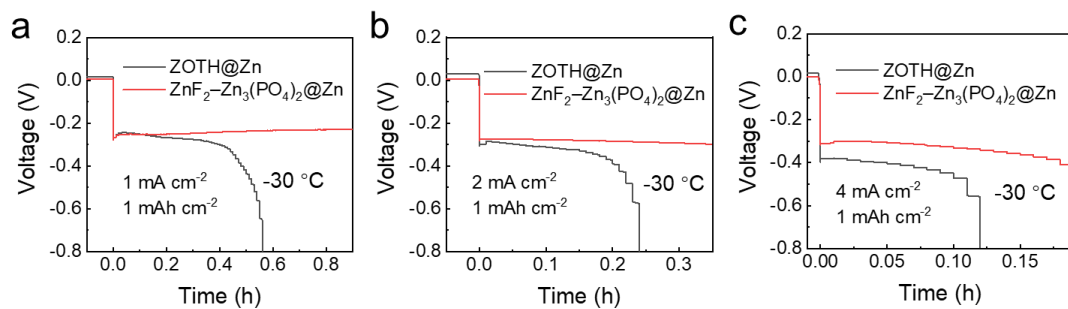

Supplementary Figure 30. Comparison of polarization voltages of Zn||Zn symmetric cells with different SEI components at -30 °C under different current densities. (a) 1 mA cm<sup>-2</sup>, (b) 2 mA cm<sup>-2</sup> and (c) 4 mA cm<sup>-2</sup>.

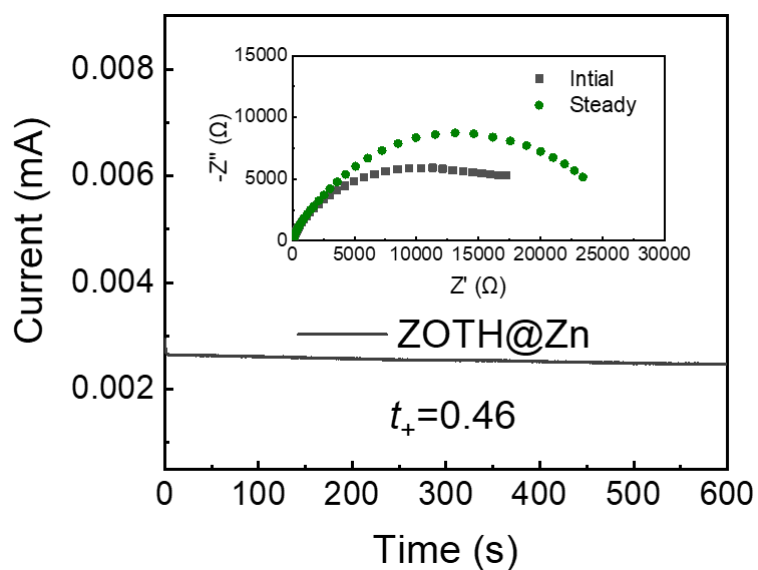

Supplementary Figure 31.  $\text{Zn}^{2+}$  transference number test for ZOTH@Zn in symmetric cell at  $-30\text{ }^{\circ}\text{C}$ . Inset: Impedance spectra before and after  $i$ - $t$  testing.

The  $\text{Zn}^{2+}$  transference number ( $t_+$ ) was determined as

$$t_+ = \frac{I_S(V - I_0 R_0)}{I_0(V - I_S R_S)}$$

Where  $V$ ,  $I_0$  ( $I_S$ ) and  $R_0$  ( $R_S$ ) represent applied voltage (10 mV), initial (steady) current response and electrode resistance, respectively. Their values are as follows:

| Simple                                   | $I_0$ (mA)             | $R_0$ ( $\Omega$ ) | $I_S$ (mA)             | $R_S$ ( $\Omega$ ) | $t_+$ |
|------------------------------------------|------------------------|--------------------|------------------------|--------------------|-------|
| $\text{ZnF}_2^-$                         | $8.25 \times 10^{-3}$  | 7600               | $2.06 \times 10^{-3}$  | 12200              | 0.87  |
| $\text{Zn}_3(\text{PO}_4)_2 @ \text{Zn}$ |                        |                    |                        |                    |       |
| ZOTH@Zn                                  | $2.936 \times 10^{-3}$ | 14800              | $2.476 \times 10^{-3}$ | 28500              | 0.46  |



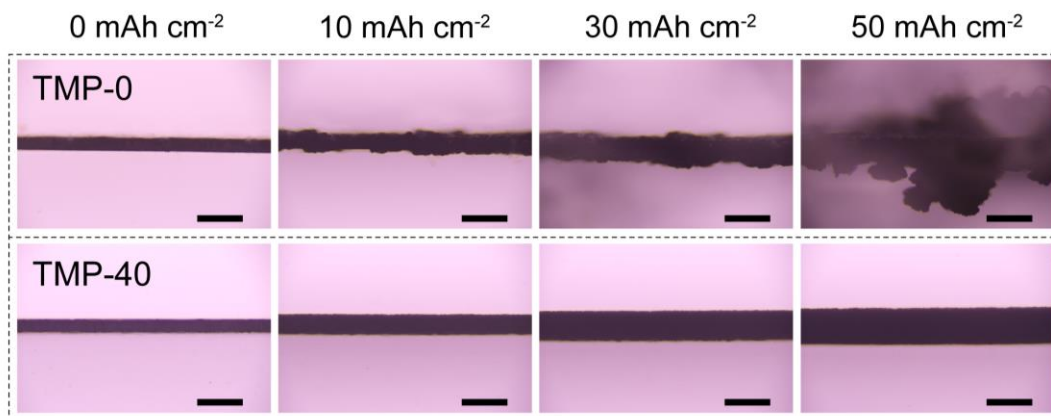

Supplementary Figure 32. In-situ optical observation of Zn deposition process in the electrolyte of TMP-0 (top) and TMP-40 (bottom). The scale bar is 200  $\mu\text{m}$ .

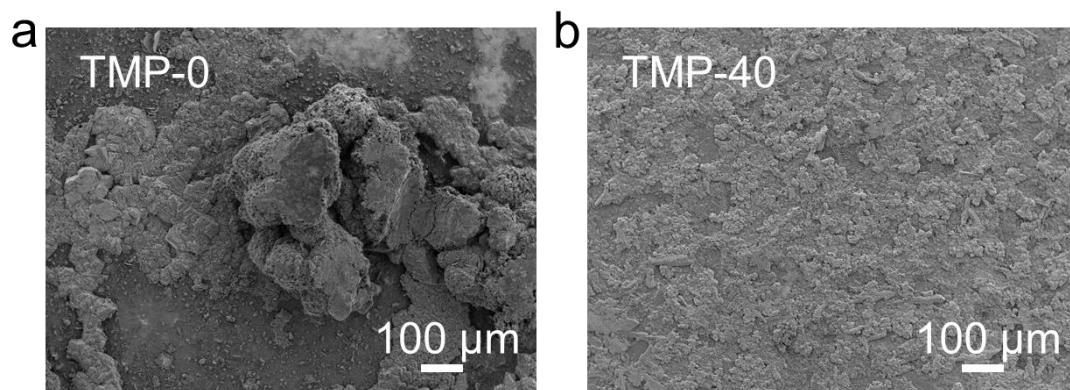

Supplementary Figure 33. Surface morphology after  $50 \text{ mAh cm}^{-2}$  of deposited Zn in different electrolytes. (a) TMP-0 and (b) TMP-40.

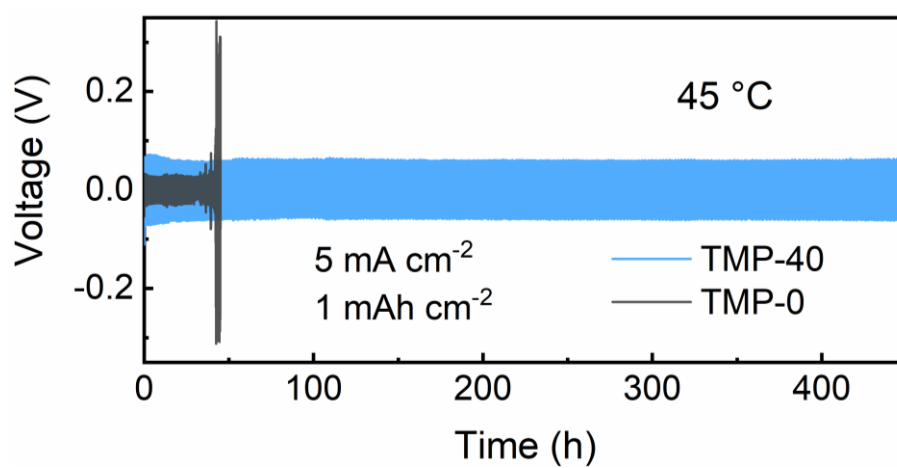

Supplementary Figure 34. Galvanostatic cycling stability of symmetric Zn cells with TMP-0 and TMP-40 electrolytes at 45 °C.

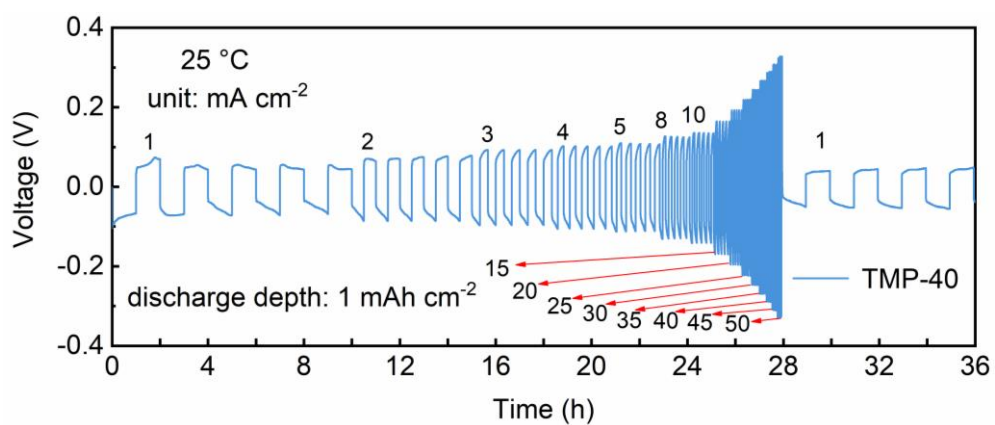

Supplementary Figure 35. Rate performance test of Zn||Zn symmetric cells with TMP-40 electrolyte at 25 °C. The current density varies from 1, 2, 3, 4, 5, 8, 10, 15, 20, 25, 30, 35, 40, 45 to 50 mA cm<sup>-2</sup> every 5 cycles with a discharge depth fixed at 1 mAh cm<sup>-2</sup>.

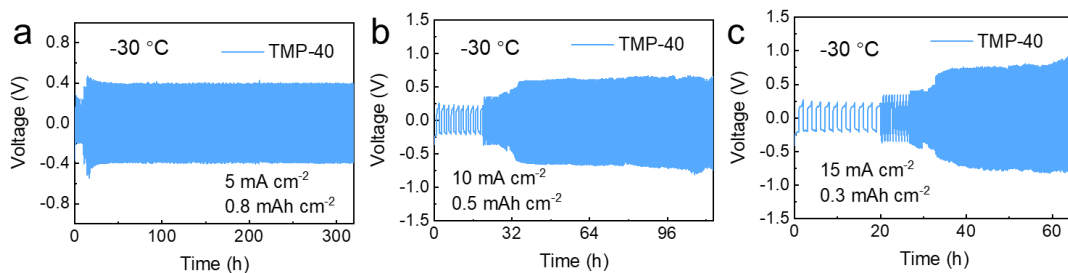

Supplementary Figure 36. Cycling stability of symmetric Zn cells with TMP-40 electrolyte at high current densities under  $-30\text{ }^{\circ}\text{C}$ . (a)  $5\text{ mA cm}^{-2}$  (Pre-activate by 5 cycles at 1 and  $3\text{ mA cm}^{-2}$ , respectively), (b)  $10\text{ mA cm}^{-2}$  (Pre-activate by 10 cycles at 1, 3, 5 and  $8\text{ mA cm}^{-2}$ , respectively) and (c)  $15\text{ mA cm}^{-2}$  (Pre-activate by 10 cycles at 1, 3, 5, 8, 10 and  $12\text{ mA cm}^{-2}$ , respectively).

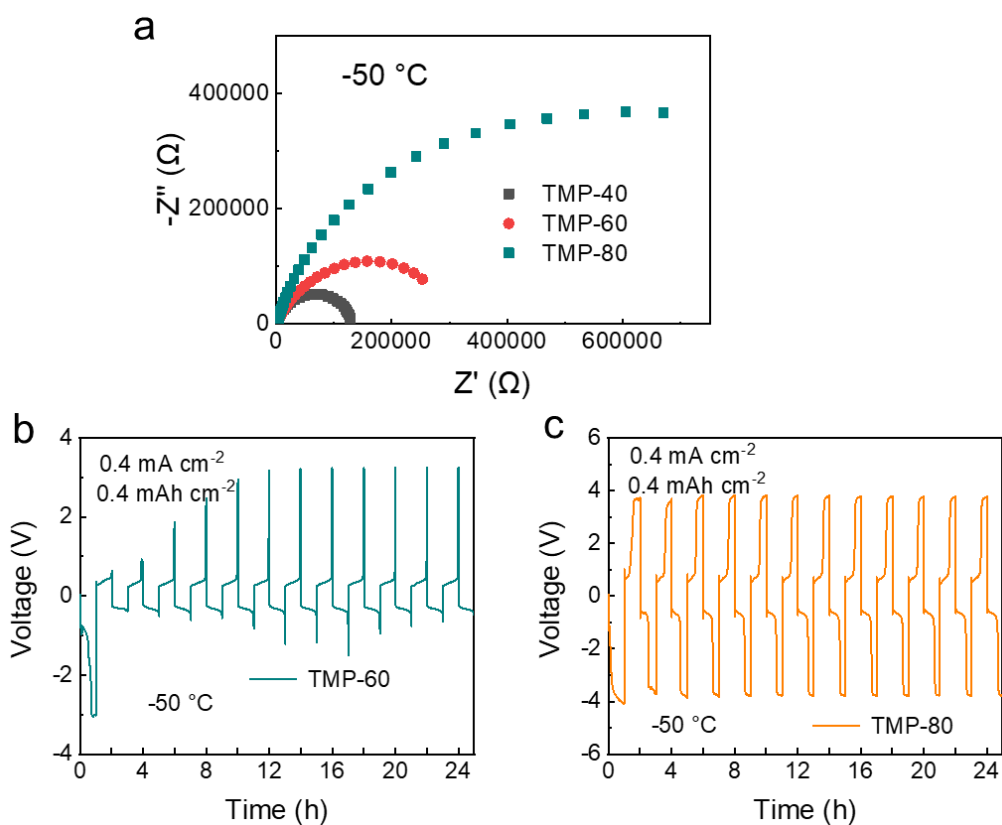

Supplementary Figure 37. Electrochemical performance comparison of different electrolytes at  $-50\text{ }^{\circ}\text{C}$ . (a) Comparison of electrochemical impedance spectra of different electrolytes at  $-50\text{ }^{\circ}\text{C}$ . Cycling stability of symmetric Zn cells with (b) TMP-60 and (c) TMP-80 electrolyte at  $0.4\text{ mA cm}^{-2}$   $0.4\text{ mAh cm}^{-2}$  under a low temperature of  $-50\text{ }^{\circ}\text{C}$ .

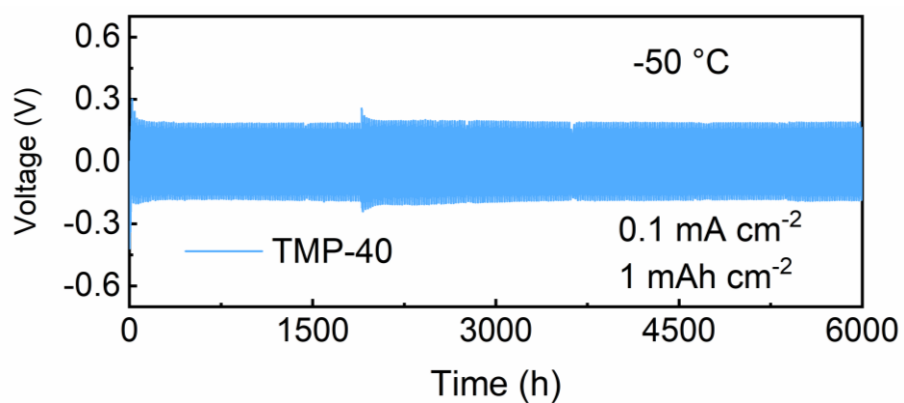

Supplementary Figure 38. Galvanostatic cycling stability of symmetric Zn cells with TMP-40 electrolyte at  $0.1 \text{ mA cm}^{-2}$  and  $1 \text{ mAh cm}^{-2}$  at  $-50 \text{ }^\circ\text{C}$ .

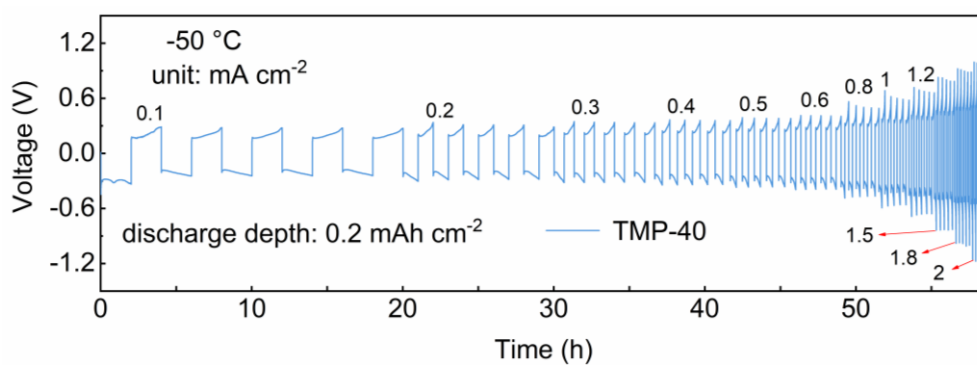

Supplementary Figure 39. Rate performance test of Zn||Zn symmetric cells with TMP-40 electrolyte at  $-50\text{ }^{\circ}\text{C}$ . The current density varies from 0.1, 0.2, 0.3, 0.4, 0.5, 0.6, 0.8, 1, 1.2, 1.5, 1.8 to 2  $\text{mA cm}^{-2}$  every 5 cycles with a discharge depth fixed at  $0.2\text{ mAh cm}^{-2}$ .



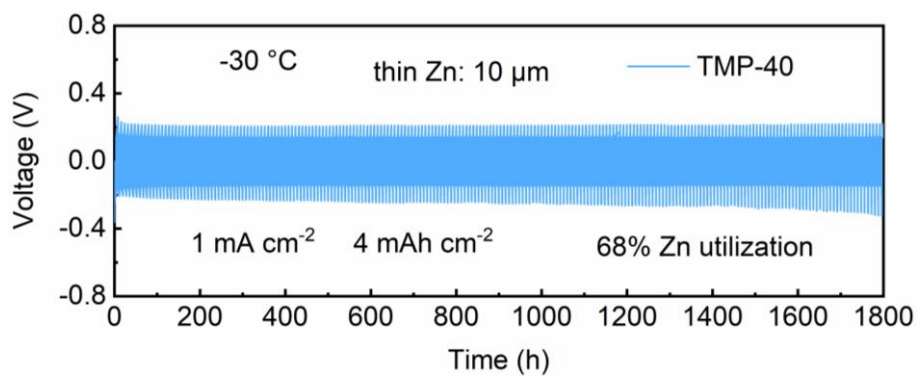

Supplementary Figure 40. Galvanostatic cycling stability of symmetric Zn cells in TMP-40 with a Zn utilization of 68% at -30 °C.

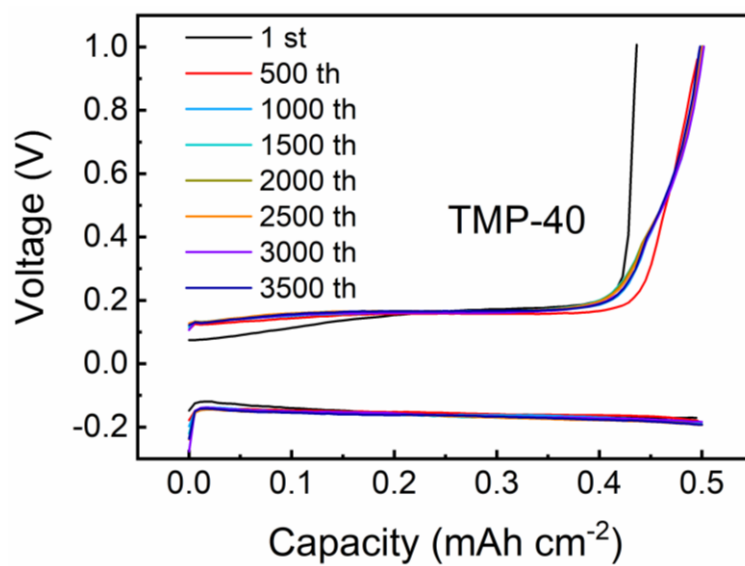

Supplementary Figure 41. Voltage profiles of Zn deposition on Ti substrate at a current density of  $1 \text{ mA cm}^{-2}$  and capacity of  $0.5 \text{ mAh cm}^{-2}$  after different cycles at  $-30 \text{ }^\circ\text{C}$ .

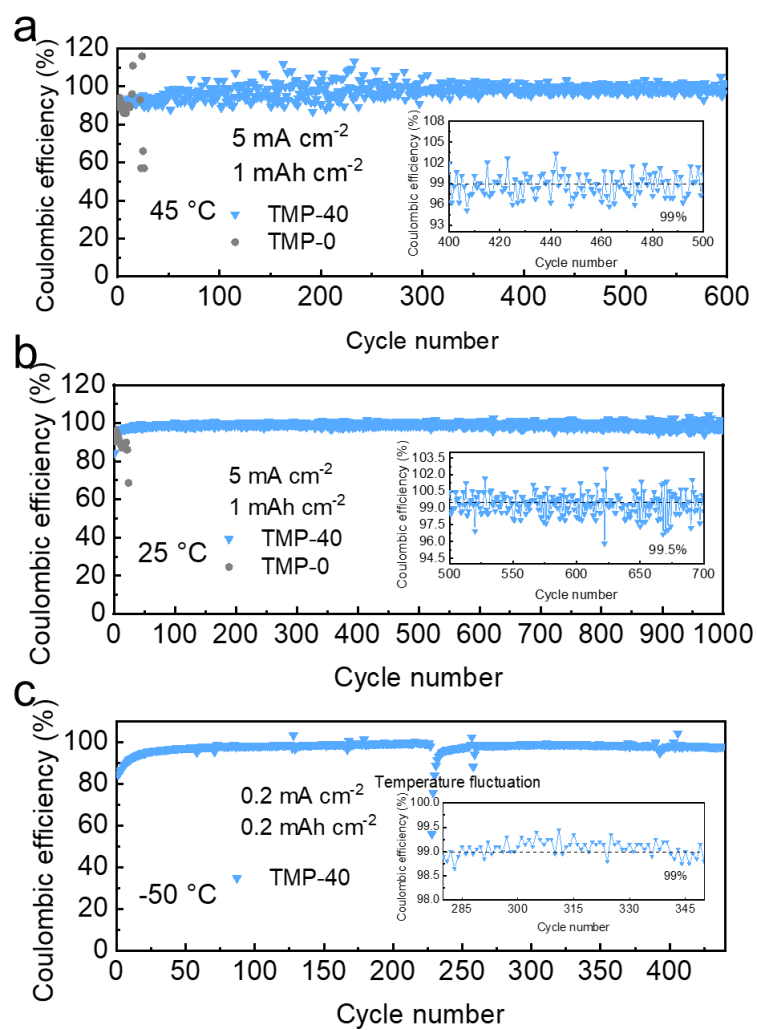

Supplementary Figure 42. Long-term Zn plating/stripping Coulombic efficiency with TMP-40 and TMP-0 electrolytes at different temperatures. (a) 45 °C, (b) 25 °C and (c) -50 °C.

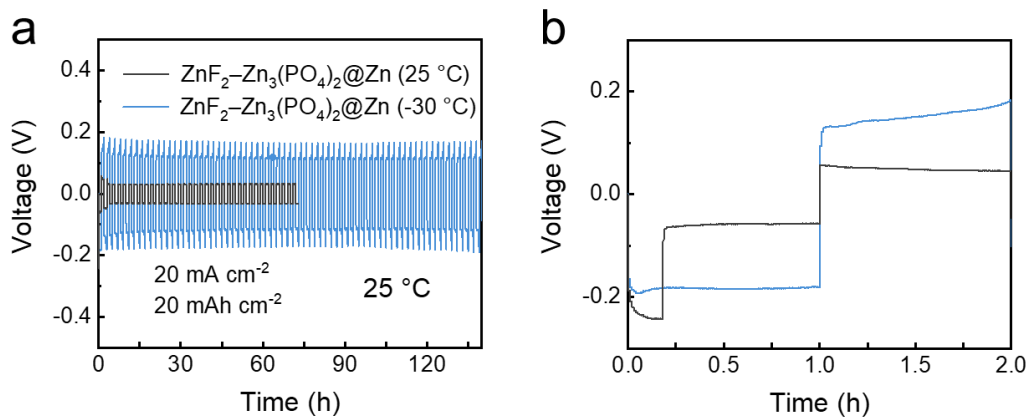

Supplementary Figure 43. Comparison of Zn plating/stripping stability for SEI formation at different temperatures. (a) Galvanostatic cycling stability of ZnF<sub>2</sub>-Zn<sub>3</sub>(PO<sub>4</sub>)<sub>2</sub>@Zn||ZnF<sub>2</sub>-Zn<sub>3</sub>(PO<sub>4</sub>)<sub>2</sub>@Zn (25 °C) and ZnF<sub>2</sub>-Zn<sub>3</sub>(PO<sub>4</sub>)<sub>2</sub>@Zn||ZnF<sub>2</sub>-Zn<sub>3</sub>(PO<sub>4</sub>)<sub>2</sub>@Zn (-30 °C) symmetric cells with a current density of 20 mA cm<sup>-2</sup> and discharge depth of 20 mAh cm<sup>-2</sup> at 25 °C. (b) The enlarged voltage profiles at the first cycle.

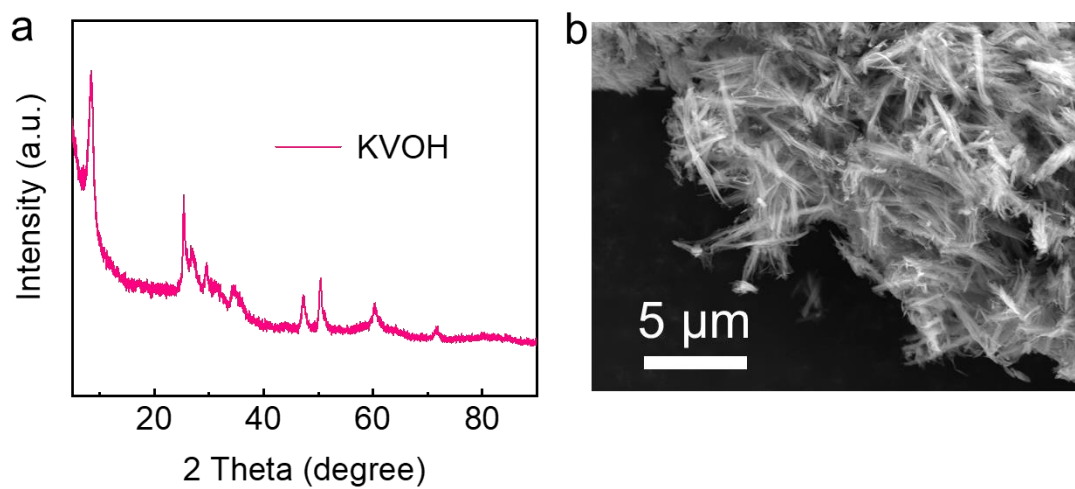

Supplementary Figure 44. Structure and morphology characterization of KVOH. (a) XRD pattern and (b) SEM image.

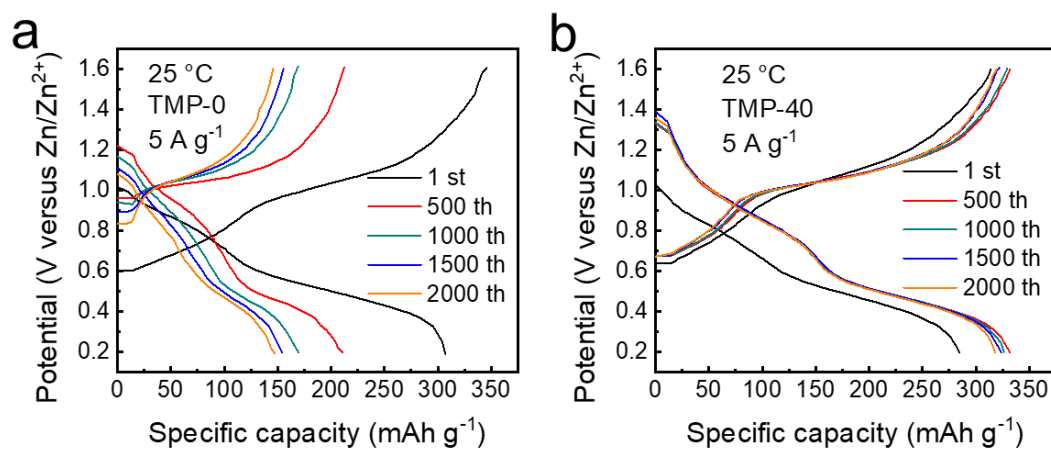

Supplementary Figure 45. Comparison of charge–discharge curves with different cycles using different electrolytes. (a) TMP–0 and (b) TMP–40.

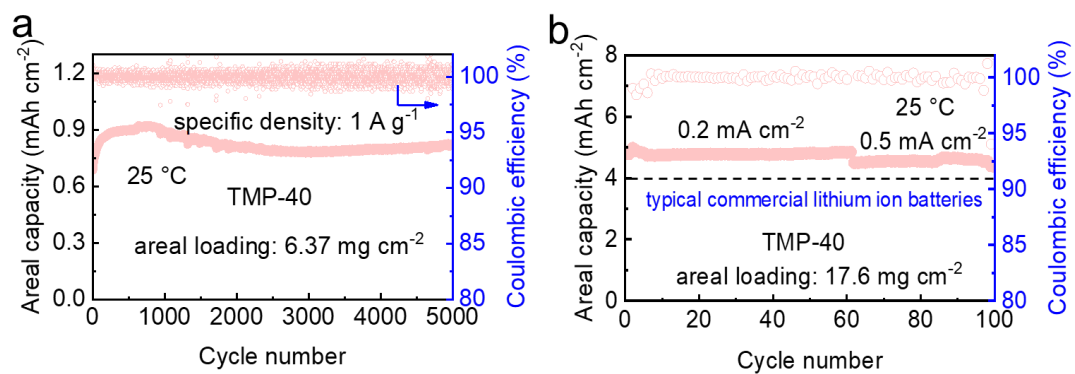

Supplementary Figure 46. The cycling performance of Zn-KVOH full cells in the TMP-40 electrolyte with different cathode areal loadings. (a) 6.37 mg cm<sup>-2</sup> (The cell was pre-activated by performing 3 cycles with small specific currents of 0.1, 0.2, and 0.5 A g<sup>-1</sup>, respectively) and (b) 17.6 mg cm<sup>-2</sup>.

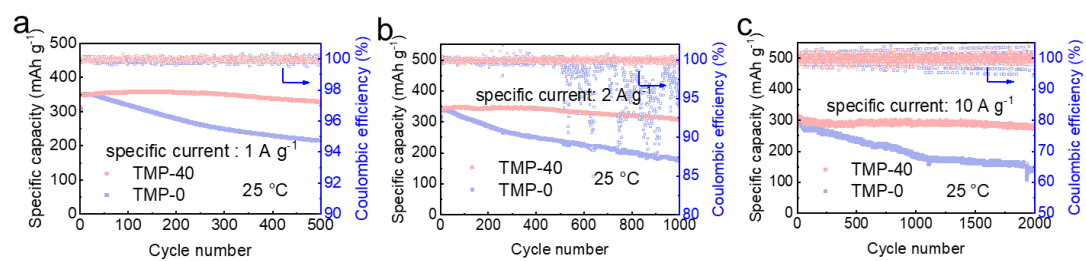

Supplementary Figure 47. The cycling performance of Zn-KVOH full cells with different specific currents at 25 °C. (a) 1 A g<sup>-1</sup>, (b) 2 A g<sup>-1</sup> and (c) 10 A g<sup>-1</sup>.



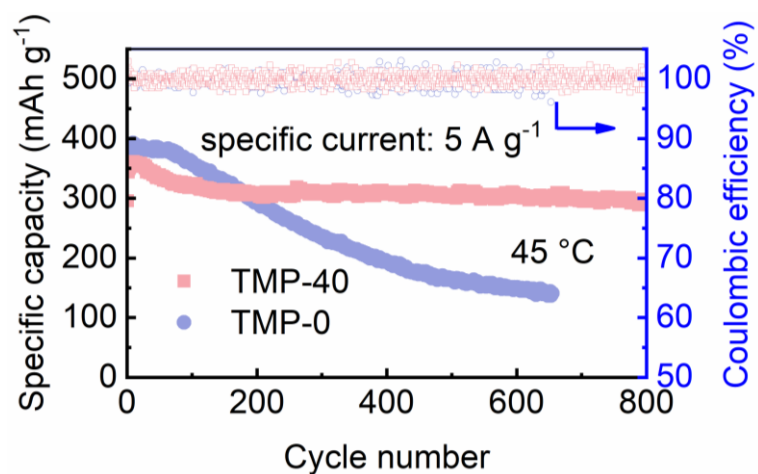

Supplementary Figure 48. The cycling performance of Zn-KVOH full cells with TMP-40 and TMP-0 electrolytes at 45 °C.

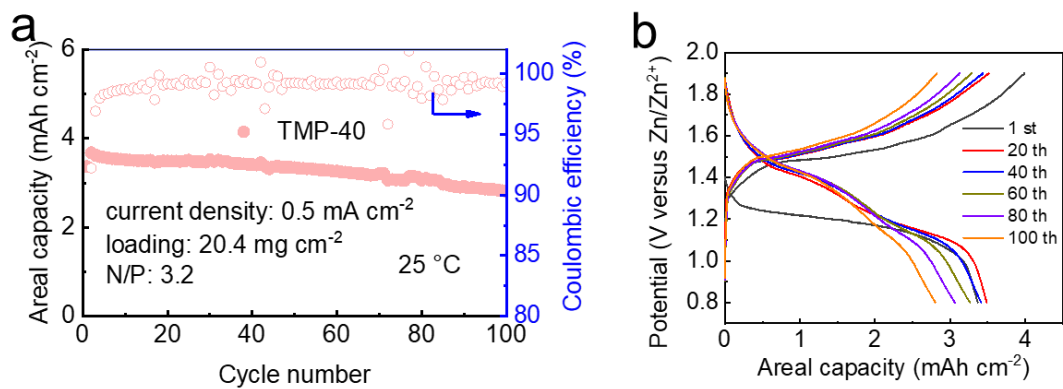

Supplementary Figure 49. Zn–MnO<sub>2</sub> full cell test under practical conditions (high loading: 20.4 mg cm<sup>-2</sup>, low N/P: 3.2) with TMP-40 electrolyte. (a) Cycling performance, (b) charge–discharge curves with different cycles.

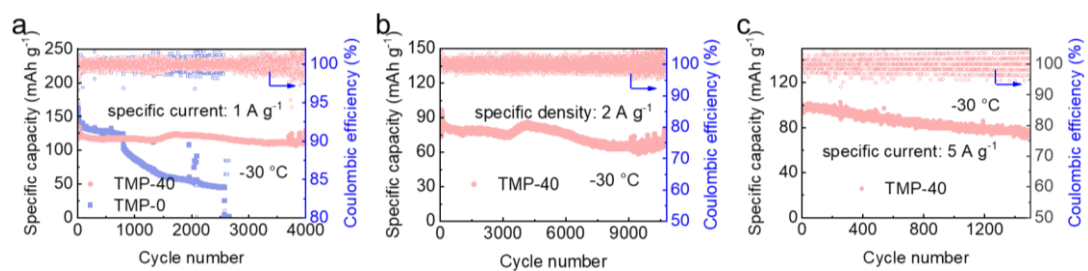

Supplementary Figure 50. The cycling performance of Zn-KVOH full cells with different specific currents at  $-30\text{ }^{\circ}\text{C}$ . (a)  $1\text{ A g}^{-1}$ , (b)  $2\text{ A g}^{-1}$  and (c)  $5\text{ A g}^{-1}$ .

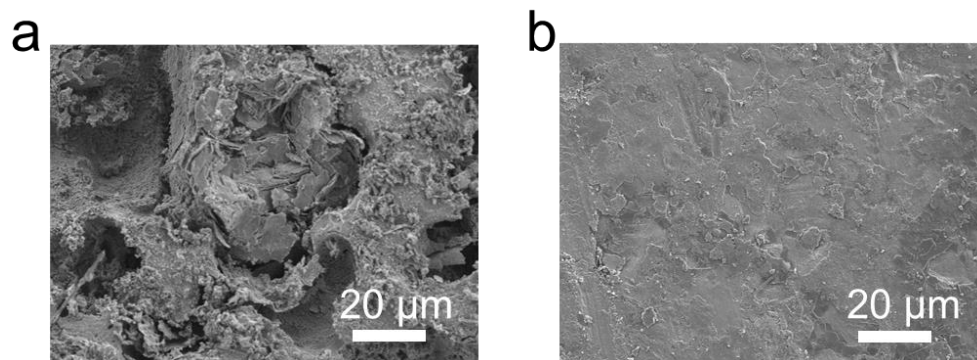

Supplementary Figure 51. Surface morphology of Zn anode dissembled from Zn–KVOH full cell after 1000 cycles in different electrolytes. (a) TMP–0 and (b) TMP–40.

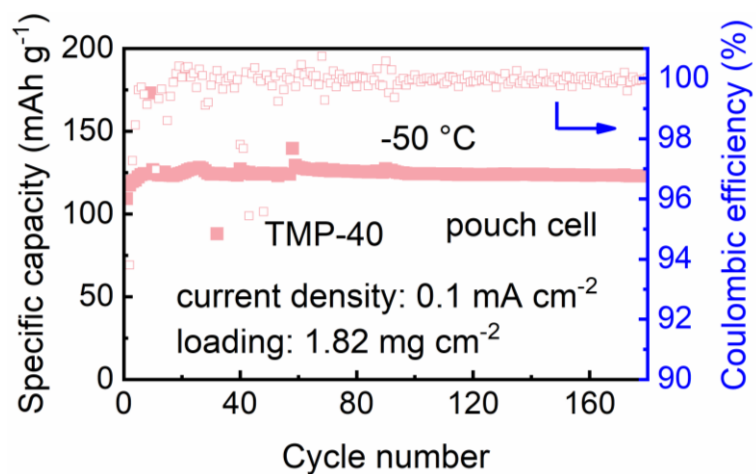

Supplementary Figure 52. Cycling performance of Zn-KVOH pouch cell in TMP-40 electrolyte at -50 °C.

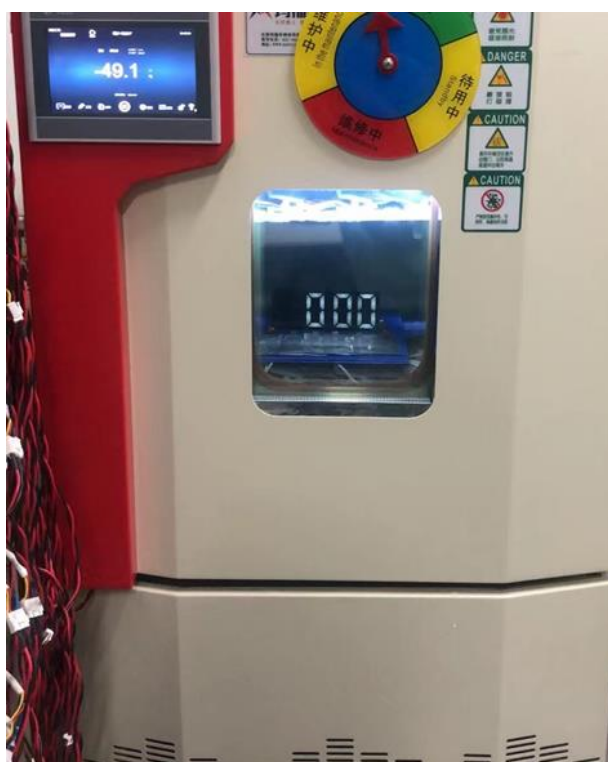

Supplementary Figure 53. Photograph of the pouch cells in the cryostat at  $-50\text{ }^{\circ}\text{C}$ .

Supplementary Table 1. The ionic conductivities of different electrolytes at various temperatures.

| Temperature<br>(°C) | Ionic conductivity (mS cm <sup>-1</sup> ) |        |        |        |        |        |        |         |
|---------------------|-------------------------------------------|--------|--------|--------|--------|--------|--------|---------|
|                     | TMP-0                                     | TMP-5  | TMP-10 | TMP-20 | TMP-40 | TMP-60 | TMP-80 | TMP-100 |
| 60                  | 200                                       | 172.41 | 160.41 | 138.50 | 83.75  | 46.81  | 15.60  | 5.72    |
| 40                  | 132.45                                    | 125.73 | 121.06 | 105.04 | 44.23  | 30.01  | 8.41   | 4.22    |
| 20                  | 88.26                                     | 87.71  | 86.28  | 73.63  | 43.29  | 18.03  | 4.16   | 1.83    |
| 10                  | 68.96                                     | 63.73  | 62.26  | 53.70  | 32.52  | 12.59  | 2.68   | 1.09    |
| 0                   | 51.54                                     | 47.84  | 44.32  | 37.50  | 23.00  | 8.67   | 1.54   | 0.59    |
| -10                 | 37.59                                     | 31.99  | 29.56  | 24.73  | 14.97  | 5.24   | 0.80   | 0.29    |
| -20                 | 23.11                                     | 20.16  | 17.75  | 15.41  | 9.22   | 3.05   | 0.41   | 0.12    |
| -30                 | 12.41                                     | 10.39  | 9.36   | 8.53   | 4.81   | 1.51   | 0.16   | 0.004   |
| -40                 | 8.33E-5                                   | 2.80   | 2.62   | 3.52   | 2.24   | 0.66   | 0.052  | 0.001   |
| -50                 | 1.11E-5                                   | 0.67   | 0.62   | 0.65   | 0.85   | 0.24   | 0.012  | 4.07E-4 |
| -60                 | -                                         | 0.11   | 0.10   | 0.12   | 0.18   | 0.096  | 0.002  | 1.35E-4 |

Supplementary Table 2. Numbers of ions and solvent molecules in the investigated simulation systems.

| System | Zn <sup>2+</sup> | OTf <sup>-</sup> | TMP | Water |
|--------|------------------|------------------|-----|-------|
| TMP-0  | 70               | 140              | 0   | 1945  |
| TMP-40 | 70               | 140              | 122 | 1167  |



Supplementary Table 3. The summary of cumulative capacity of different reports under wide temperature range.

| Refs      | Temperature (°C) | Cumulative capacity (mAh cm <sup>-2</sup> ) |
|-----------|------------------|---------------------------------------------|
| This work | 45               | 1125                                        |
|           | 25               | 1250                                        |
|           | -30              | 3600                                        |
|           | -50              | 1400                                        |
| 1         | 20               | 150                                         |
|           | -20              | 80                                          |
| 2         | 25               | 62.5                                        |
|           | 0                | 50                                          |
|           | -30              | 375                                         |
| 3         | -20              | 2500                                        |
|           | -40              | 500                                         |
|           | -50              | 50                                          |
| 4         | 25               | 750                                         |
|           | -30              | 500                                         |
| 5         | 50               | 800                                         |
|           | 25               | 1000                                        |
|           | 0                | 1000                                        |
|           | -15              | 150                                         |
| 6         | 60               | 400                                         |
|           | 20               | 500                                         |
|           | -20              | 100                                         |

Supplementary Table 4. Summary of the cycling performance of the full cells with TMP-0 or TMP-40 electrolyte at different temperatures.

| Temperature (°C) | Electrolyte | Specific current (A g <sup>-1</sup> ) | Cycle number | Capacity retention (%) |
|------------------|-------------|---------------------------------------|--------------|------------------------|
| 45               | TMP-40      | 5                                     | 800          | 85.7                   |
|                  | TMP-0       | 5                                     | 655          | 36.5                   |
| 25               | TMP-40      | 1                                     | 500          | 93.8                   |
|                  |             | 2                                     | 1000         | 89.6                   |
|                  |             | 5                                     | 2300         | 98.3                   |
|                  |             | 10                                    | 2000         | 90.0                   |
|                  | TMP-0       | 1                                     | 500          | 61.8                   |
|                  |             | 2                                     | 1000         | 52.0                   |
|                  |             | 5                                     | 2300         | 41.1                   |
|                  |             | 10                                    | 2000         | 46.4                   |
| -30              | TMP-40      | 1                                     | 4000         | 88.0                   |
|                  |             | 2                                     | 10800        | 73.3                   |
|                  |             | 5                                     | 1500         | 73.6                   |
|                  | TMP-0       | 1                                     | 2664         | 1.2                    |
| -50              | TMP-40      | 0.5                                   | 12000        | 86.1                   |

Supplementary Table 5. Summary of the cycle performance of the full cells with various published works on electrolyte modification for aqueous Zn batteries.

| Refs      | Temperature (°C) | Discharge capacity (mAh g <sup>-1</sup> ) | Specific current (A g <sup>-1</sup> ) | Cycle number | Capacity decay rate per cycle (%) |
|-----------|------------------|-------------------------------------------|---------------------------------------|--------------|-----------------------------------|
| This work | 45               | 343.4                                     | 5                                     | 800          | 0.018                             |
|           | 25               | 329.1                                     | 5                                     | 2300         | 0.00074                           |
|           | -30              | 95.5                                      | 2                                     | 10800        | 0.0025                            |
|           | -50              | 59                                        | 0.5                                   | 12000        | 0.0012                            |
| 1         | -20              | ~100                                      | 0.2                                   | 250          | 0.0080                            |
| 3         | -40              | 69                                        | 1                                     | 1000         | ~0.0069                           |
| 4         | 25               | 80                                        | 5                                     | 2000         | ~0.010                            |
|           | -30              | 70                                        | 5                                     | 2500         | ~0.0060                           |
| 5         | 50               | ~100                                      | --                                    | 200          | 0.34                              |
|           | 25               | 103.9                                     | --                                    | 600          | 0.051                             |
|           | 0                | 77.8                                      | --                                    | 1000         | 0.048                             |
|           | -15              | ~80                                       | 0.1                                   | 450          | ~0                                |
| 6         | 25               | 290                                       | 2                                     | 1500         | 0.0040                            |
|           | -30              | 131                                       | 0.1                                   | 300          | 0.066                             |
| 7         | 25               | ~150                                      | 1                                     | 800          | 0.050                             |
|           | -15              | ~110                                      | 0.5                                   | 300          | 0.052                             |
| 8         | -50              | 105.7                                     | ~0.05                                 | 200          | 0.025                             |
| 9         | 20               | 220                                       | ~0.3                                  | 500          | 0.16                              |
|           | -30              | 175                                       | ~0.3                                  | 1000         | 0.020                             |
| 10        | 25               | ~170                                      | 2.6                                   | 500          | 0.0094                            |
| 11        | 25               | ~140                                      | 5                                     | 2000         | 0.0072                            |
|           | -10              | ~110                                      | 5                                     | 2000         | 0.0054                            |
| 12        | 25               | 230                                       | 1                                     | 500          | 0.032                             |
| 13        | 60               | 200                                       | 2                                     | 100          | ~0.54                             |
|           | 20               | 82                                        | 2                                     | 1000         | ~0                                |
|           | -20              | ~60                                       | 0.2                                   | 1000         | ~0                                |
| 14        | 25               | 265.6                                     | 1                                     | 1000         | 0.020                             |
| 15        | 25               | 160                                       | 6                                     | 1000         | ~0                                |
|           | -20              | 65                                        | 6                                     | 1000         | ~0                                |
|           | -50              | 40                                        | 6                                     | 1000         | ~0                                |
| 16        | 30               | 229                                       | 5                                     | 1000         | 0.0030                            |
|           | -40              | 168                                       | 0.2                                   | 400          | ~0                                |

## Supplementary References

1. Chang, N. N. et al. An aqueous hybrid electrolyte for low-temperature zinc-based energy storage devices. *Energy Environ. Sci.* **13**, 3527–3535 (2020).
2. Sun, T. J. et al. An ultralow-temperature aqueous zinc-ion battery. *J. Mater. Chem. A* **9**, 7042–7047 (2021).
3. Wang, J. W. et al. Low-temperature and high-rate Zn metal batteries enabled by mitigating Zn<sup>2+</sup> concentration polarization. *Chem. Eng. J.* **433**, 134589 (2022).
4. Huang, S. W. et al. Antifreezing hydrogel electrolyte with ternary hydrogen bonding for high-performance zinc-ion batteries. *Adv. Mater.* **34**, 2110140 (2022).
5. Hou, Z., Lu, Z. H., Chen, Q. W. & Zhang, B. Realizing wide-temperature Zn metal anodes through concurrent interface stability regulation and solvation structure modulation. *Energy Storage Mater.* **42**, 517–525 (2021).
6. Zhou, J. et al. Highly Reversible and Stable Zn Metal Anode under Wide Temperature Conditions Enabled by Modulating Electrolyte Chemistry. *Chem. Eng. J.* **442**, 136218 (2022).
7. Han, D. L. et al. A non-flammable hydrous organic electrolyte for sustainable zinc batteries. *Nat. Sustain.* **5**, 205–213 (2022).
8. Cao, L. S. et al. Highly reversible aqueous zinc batteries enabled by zincophilic–zincophobic interfacial layers and interrupted hydrogen-bond electrolytes. *Angew. Chem. Int. Ed.* **60**, 18845–18851 (2021).
9. Gao, S. Y. et al. High energy and stable subfreezing aqueous Zn-MnO<sub>2</sub> batteries with selective and pseudocapacitive Zn-ion insertion in MnO<sub>2</sub>. *Adv. Mater.* **34**, 2201510 (2022).
10. Cao, L. S. et al. Solvation structure design for aqueous Zn metal batteries. *J. Am. Chem. Soc.* **142**, 21404–21409 (2020).
11. Hao, J. N. et al. Boosting zinc electrode reversibility in aqueous electrolytes by using low-cost antisolvents. *Angew. Chem. Int. Ed.* **60**, 7366–7375 (2021).
12. Han, D. L. et al. A self-regulated interface toward highly reversible aqueous zinc batteries. *Adv. Energy Mater.* **12**, 2102982 (2022).
13. Du, H. H. et al. Improving zinc anode reversibility by hydrogen bond in hybrid aqueous electrolyte. *Chem. Eng. J.* **427**, 131705 (2022).

14. Sun, P. et al. Simultaneous Regulation on Solvation Shell and Electrode Interface for Dendrite-free Zn ion batteries achieved by a low-cost glucose additive. *Angew. Chem. Int. Ed.* **60**, 18247–18255 (2021).
15. Yang, G. S. et al. An aqueous zinc-ion battery working at  $-50\text{ }^{\circ}\text{C}$  enabled by low-concentration perchlorate-based chaotropic salt electrolyte. *Ecomat* **4**, e12165 (2022).
16. Liu, D. S. et al. Regulating the electrolyte solvation structure enables ultralong lifespan Vanadium-based cathodes with excellent low-temperature Performance. *Adv. Funct. Mater.* **32**, 2111714 (2022).
